1 **Heat-inactivated modified vaccinia virus Ankara boosts Th1-biased cellular and humoral**  
2 **immune responses as a vaccine adjuvant by activating the STING-mediated cytosolic DNA-**  
3 **sensing pathway**

4  
5 Ning Yang<sup>1</sup>, Aitor Garzia<sup>2</sup>, Cindy Meyer<sup>2</sup>, Thomas Tuschl<sup>2</sup>, Taha Merghoub<sup>3,4,5</sup>, Jedd D.  
6 Wolchok<sup>3,4,5</sup>, and Liang Deng<sup>1,4,5\*</sup>

7  
8 <sup>1</sup>Dermatology Service, Department of Medicine, Memorial Sloan Kettering Cancer Center, New  
9 York, NY, 10065, USA

10 <sup>2</sup>Laboratory of RNA Molecular Biology, The Rockefeller University, New York, NY, 10065, USA

11 <sup>3</sup>Immuno-oncology service, Human Oncology and Pathogenesis Program; Memorial Sloan  
12 Kettering Cancer Center, New York, NY 10065, USA

13 <sup>4</sup>Parker Institute for Cancer Immunotherapy, Memorial Sloan Kettering Cancer Center, New  
14 York, NY, USA

15 <sup>5</sup>Weill Cornell Medical College, New York, NY, USA

16 \*corresponding authors. Mailing address for Liang Deng: Dermatology Service, Department of  
17 Medicine, Memorial Sloan Kettering Cancer Center, 1275 York Ave., New York, NY 10065.  
18 Email: [dengl@mskcc.org](mailto:dengl@mskcc.org).

19

20 Short title: heat-inactivated MVA as a vaccine adjuvant

21

22

23 **Abstract**

24 **Background:** Protein or peptide-based subunit vaccines are promising platforms for combating  
25 human cancers and infectious diseases. However, one primary concern regarding subunit  
26 vaccines is the relatively weak immune responses induced by proteins or peptides. Therefore,  
27 developing novel and effective vaccine adjuvants is critical for the success of subunit vaccines.  
28 Modified vaccinia virus (MVA) is a safe and effective vaccine against smallpox and monkeypox.  
29 In this study, we explored the potential of heat-inactivated MVA (heat-iMVA) as a novel vaccine  
30 adjuvant.

31 **Methods:** We co-administered heat-iMVA with a model antigen, chicken ovalbumin (OVA),  
32 either intramuscularly or subcutaneously twice, two weeks apart, and analyzed anti-OVA  
33 specific CD8<sup>+</sup> and CD4<sup>+</sup> T cells in the spleens and skin draining lymph nodes (dLNs) and serum  
34 anti-OVA IgG1 and IgG2c antibodies. We also compared the adjuvanticity of heat-iMVA with  
35 several known vaccine adjuvants, including complete Freund's adjuvant (CFA) and AddaVax, an  
36 MF59-like preclinical grade nano-emulsion. In addition, we tested whether co-administration of  
37 heat-iMVA plus tumor neoantigen peptides or irradiated tumor cells improves antitumor efficacy  
38 in a B16-F10 therapeutic vaccination model. Using Stimulator of Interferon Genes (STING) or  
39 Batf3-deficient mice, we evaluated the contribution of the STING pathway and Batf3-dependent  
40 CD103<sup>+</sup>/CD8 $\alpha$  DCs in heat-iMVA-induced immunity.

41 **Results:** Co-administration of protein- or peptide-based immunogens with heat-iMVA  
42 dramatically enhances Th1-biased cellular and humoral immune responses. This adjuvant effect  
43 of heat-iMVA is dependent on the STING-mediated cytosolic DNA-sensing pathway, and the  
44 antigen-specific CD8<sup>+</sup> T cell response requires Batf3-dependent CD103<sup>+</sup>/CD8 $\alpha$ <sup>+</sup> dendritic cells  
45 (DCs). Heat-iMVA infection of bone marrow-derived DCs (BMDCs) promoted antigen cross-

46 presentation, whereas live MVA infection did not. RNA-seq analyses revealed that heat-iMVA is  
47 a more potent activator of the STING pathway than live MVA. Additionally, combining tumor  
48 neoantigen peptides or irradiated tumor cells with heat-iMVA delayed tumor growth and  
49 extended the median survival in B16-F10 therapeutic vaccination models.

50 **Conclusions:** Heat-iMVA induces type I interferon (IFN) production and antigen cross-  
51 presentation via a STING-dependent mechanism in DCs. Co-administration of heat-iMVA with  
52 peptide antigen generates strong Th1-biased cellular and humoral immunity. Collectively, our  
53 results demonstrate that heat-iMVA is a safe and potent vaccine adjuvant.

54

55 Keywords: Vaccinia virus, poxvirus, vaccine adjuvant, dendritic cell maturation, STING  
56 (Stimulator of interferon genes), the cytosolic-DNA-sensing pathway, neoantigen, SARS-CoV2

## 57 **BACKGROUND**

58 Discoveries of cancer neoantigens generated by somatic mutations in cancer cells have  
59 brought excitement and renewed interest in cancer vaccines <sup>1-5</sup> and personalized neoantigen  
60 peptide vaccination has shown promising results in clinical trials <sup>2,6,7</sup>. However, recombinant  
61 protein or peptide vaccines usually generate weak immune responses, safe and effective vaccine  
62 adjuvants that boost vaccine efficacy are urgently needed.

63 Licensed vaccine adjuvants include inorganic aluminum salts (alum), the oil-in-water  
64 emulsion MF59, monophosphoryl lipid A (MPL) adsorbed on aluminum salts (AS04), and the  
65 toll-like receptor 9 (TLR9) agonist CpG 1018 <sup>8</sup>. In addition to TLR agonists, agents that activate  
66 the cytosolic pattern recognition receptors, for example, stimulator of interferon genes (STING)  
67 agonists, have also been explored as vaccine adjuvants <sup>9,10</sup>. It has been postulated that vaccine  
68 adjuvants that mimic natural infection might elicit potent and durable immune responses via the  
69 activation of innate immune-sensing pathways <sup>11</sup>.

70 Vaccinia virus (VACV) belongs to the poxvirus family, and modified vaccinia virus  
71 Ankara (MVA) is a highly attenuated vaccinia strain, a safe and effective second-generation  
72 smallpox vaccine and a vaccine vector against other infectious agents <sup>12-19</sup>. We have previously  
73 shown that wild-type vaccinia (WT VACV) infection of bone marrow-derived dendritic cells  
74 (BMDCs) fails to induce type I IFN production. By contrast, MVA infection induces IFN  
75 production via the cGAS/STING-mediated cytosolic DNA-sensing pathway <sup>20</sup>.

76 Vaccinia virus encodes many immunomodulatory genes to evade the host immune  
77 system <sup>21-23</sup>. Inactivation of WT VACV or MVA, by heating MVA at 55°C for 1h, reduces  
78 infectivity by 1000-fold and much more potently induces type I IFN production than live viruses  
79 in conventional DCs (cDCs) or plasmacytoid DCs (pDCs) <sup>24-26</sup>. Based on its safety and immune-

80 stimulating features, we hypothesized that heat-inactivated vaccinia or MVA could act as  
81 vaccine adjuvant. Here, we show that the heat-inactivated MVA (heat-iMVA) can boost the T  
82 and B cell responses of subunit vaccines. Furthermore, co-administration of heat-iMVA with  
83 tumor neoantigen peptides delays tumor growth and prolongs mouse survival in a syngeneic  
84 B16-F10 melanoma model. In summary, our results provide proof-of-concept for heat-iMVA as  
85 a vaccine adjuvant against infectious diseases and cancers.

86

## 87 **MATERIALS AND METHODS**

### 88 **Study design**

89 We used intramuscular and subcutaneous vaccinations to compare the adjuvanticity of heat-iMVA  
90 with known vaccine adjuvants, CFA and Addavax. Controls groups with PBS mock vaccination  
91 were used. OVA was used as a model antigen. In most of the experiments, female C57BL/6J mice  
92 were used. The sample size calculation was based on expected immune adjuvant effects of known  
93 adjuvants and preliminary results with heat-iMVA as a vaccine adjuvant, variability of the  
94 measurements, and a target power of 95%. Randomization was performed to minimize  
95 confounders among the treatment and control groups. The researcher who performed the outcome  
96 assessment and the data analysis were not aware of the group allocation. Outcome measures  
97 include tumor volumes and mice survival.

98

### 99 **Mice**

100 Female C57BL/6J mice between 6 and 8 weeks of age were purchased from the Jackson  
101 Laboratory and were used for vaccination experiments and for the preparation of bone marrow-  
102 derived dendritic cells (BMDCs). *Batf3<sup>-/-</sup>*, *STING<sup>Gt/Gt</sup>*, and *cGAS<sup>-/-</sup>* mice were generated in the  
103 laboratories of Kenneth Murphy, Russell Vance, and Herbert (Skip) Virgin, respectively. Mice

104 deficient for IFN $\alpha$ / $\beta$  receptor (IFNAR<sup>-/-</sup>) were provided by Eric Pamer. IFNAR<sup>-/-</sup>OT-1 mice were  
105 generated by crossing IFNAR<sup>-/-</sup> mice and OT-1 transgenic mice for several generations. All mice  
106 were maintained in the animal facility at the Sloan Kettering Cancer Institute. All procedures  
107 were performed in strict accordance with the recommendations in the *Guide for the Care and*  
108 *Use of Laboratory Animals* of the National Institute of Health. The protocol was approved by the  
109 Committee on the Ethics of Animal Experiments of Sloan-Kettering Cancer Institute. We used  
110 the ARRIVE reporting guidelines <sup>27</sup>

111

### 112 **Cell lines and primary Cells**

113 BHK-21 (baby hamster kidney cell, ATCC CCL-10) cells were used to propagate the MVA  
114 virus. The procedure for the generation of GM-CSF-BMDCs and Flt3L-BMDCs have been  
115 described <sup>26</sup>. HEK293T cell line expressing human ACE2 (hACE2) were generated by  
116 transduction with vesicular stomatitis virus (VSV) G protein-pseudotyped murine leukemia  
117 viruses (MLV) containing pQCXIP-hACE2-c9 as described <sup>28</sup>. The murine melanoma cell line  
118 B16-F10 was originally obtained from I. Fidler (MD Anderson Cancer Center). B16-GM-CSF  
119 cells were generated by Glenn Dranoff <sup>29</sup>.

120

### 121 **Viruses**

122 MVA virus was kindly provided by Gerd Sutter (University of Munich). Heat-iMVA was  
123 generated by incubating purified MVA virus at 55 °C for 1 hour <sup>25</sup>. SARS-CoV-2 pseudoviruses  
124 were produced using a method as described previously <sup>30</sup>. Briefly, HEK293T cells were co-  
125 transfected with pQCXIG-SARS-CoV-2-Spike, pMD2.G (VSV-G) and a gag/pol expression

126 plasmid. At 48 h post-transfection, virus supernatants were harvested and filtered through a 0.45-  
127  $\mu\text{m}$  filter and stored at  $-80\text{ }^{\circ}\text{C}$ .

128

## 129 **Reagents**

130 EndoFit Ovalbumin, CFA, AddaVax, and poly(I:C) were purchased from InvivoGen. The  
131 SARS-CoV-2 spike protein was purchased from RayBiotech. Alexa Fluor<sup>TM</sup> 647 conjugated  
132 OVA was purchased from Thermo Fisher. B16-F10 tumor neoantigen peptides were synthesized  
133 by GenScript (Piscataway, NJ). The sequences are as follows: M27:

134 REGVELCPGKYE MRRHGTTHSLVIHD; M30: PSKPSFQEFVDWENV SPELNSTDQPFL;  
135 M48: SHCHWNDLAVIPAGVVHNWDFEPRKVS using the mutation information described <sup>4</sup>.

136

## 137 **OVA vaccination procedure**

138 WT C57BL/6J mice were anesthetized and vaccinated initially on day 0 and boosted on day 14  
139 with either OVA (10  $\mu\text{g}$ ) alone, or OVA (10  $\mu\text{g}$ ) + heat-iMVA (an equivalent of  $10^7$  pfu) in a  
140 volume 100  $\mu\text{l}$  intramuscularly (IM) or subcutaneously (SC). Mice were euthanized on day 21.  
141 Spleens, draining lymph nodes (dLNs), and blood were collected for analyzing OVA-specific  
142 CD8<sup>+</sup>, CD4<sup>+</sup>, and B cell responses. In some cases, OVA proteins were mixed with CFA or  
143 AddaVax. In some cases, STING<sup>Gt/Gt</sup>, Batf3<sup>-/-</sup>, and age-matched WT C57BL/6J mice were  
144 vaccinated with OVA + heat-iMVA as described above.

145

## 146 **SARS-CoV-2 spike protein vaccination procedure**

147 4-5 mice in each group were anesthetized and vaccinated with SARS-CoV-2 recombinant spike  
148 protein (1  $\mu\text{g}$ ) alone or with spike (1  $\mu\text{g}$ ) + heat-iMVA in a volume 100  $\mu\text{l}$  intramuscularly on

149 day 0 and boosted on day 21. Mice were euthanized on day 28. Spike-specific immunoglobulin  
150 G1 (IgG1) or immunoglobulin G2c (IgG2c) titers in the serum from PBS, spike alone, or spike +  
151 heat-iMVA-vaccinated mice were determined by ELISA.

152

### 153 **Therapeutic vaccination using neoantigen peptides with or without adjuvants**

154 B16-F10 melanoma cells ( $5 \times 10^4$ ) were implanted intradermally into the shaved skin on the right  
155 flank of WT C57BL/6J mice. On day 3, 6, and 9, 4 groups of mice (10 mice in each group) were  
156 subcutaneously vaccinated at the left flanks with B16-F10 neoantigen peptide mix (M27, M30  
157 and M48) ( $100 \mu\text{g}$  each)<sup>4</sup>, with or without heat-iMVA or poly(I:C) ( $50 \mu\text{g}$ ), or with PBS mock  
158 control. Mice were monitored daily, and tumor sizes were measured twice a week. Tumor  
159 volumes were calculated according to the following formula:  $l$  (length)  $\times$   $w$  (width)  $\times$   $h$   
160 (height)/2. Mice were euthanized for signs of distress or when the diameter of the tumor reached  
161 10 mm.

162

### 163 **Therapeutic vaccination using irradiated B16-GM-CSF whole-cell with and without** 164 **adjuvants**

165 B16-F10 melanoma cells ( $5 \times 10^4$ ) were implanted intradermally into the shaved skin on the right  
166 flank of WT C57BL/6J mice. On day 3, 6, and 9, four groups of mice (10 mice in each group)  
167 were subcutaneously vaccinated at the left flanks with irradiated B16-GM-CSF ( $1 \times 10^6$  cells  
168 after 150 Gy  $\gamma$ -irradiation) with or without heat-iMVA or poly(I:C), or with PBS mock control.  
169 Mice were monitored daily, and tumor sizes were measured twice a week.

170

### 171 **Flow cytometry analysis of antigen-specific T cells in the spleens and dLNs.**



172 Splens and dLNs from vaccinated mice was collected and processed using Miltenyi  
173 GentleMACS™ Dissociator. Red blood cells were lysed using ACK buffer. For intracellular  
174 cytokine staining, splenic or lymph node single-cell suspensions were stimulated with 10 µg/ml  
175 peptides (OVA<sub>257-264</sub> or OVA<sub>323-339</sub>). After 1 h of stimulation, GolgiPlug (BD Biosciences)  
176 (1:1000 dilution) was added and incubated for 12 h. Cells were then treated with BD  
177 Cytotfix/Cytoperm™ kit prior to staining with respective antibodies for flow cytometry analyses.  
178 The antibodies used for this assay are as follows: BioLegend: CD3e (145-2C11), CD4 (GK1.5),  
179 CD8 (53-5.8), IFN-γ (XMG1.2).

180

#### 181 **Antibodies titer determination by ELISA**

182 ELISA was used to determine anti-OVA or anti-SARS-CoV-2 spike IgG titers. Briefly, 96-well  
183 microtiter plates (Thermo Fisher) were coated with 2.0 µg/mL of OVA (Invivogen) or SARS-  
184 CoV-2 spike protein (RayBiotech) overnight at 4°C. Plates were washed with 0.05% Tween-20 in  
185 PBS (PBST) and blocked with 1% BSA/PBS-T. Mouse serum samples were two-fold serially  
186 diluted in PBST, added to the blocked plates, and incubated at 37°C for 1 h. Following incubation,  
187 plates were washed with PBS-T and incubated with horseradish peroxidase (HRP)-conjugated goat  
188 anti-mouse IgG1 or goat anti-mouse IgG2c (Southern Biotech) for 1 h. Plates were washed with  
189 PBS-T and TMB substrate (BD Bioscience) was added. Reactions were stopped with 50 µl 2N  
190 H<sub>2</sub>SO<sub>4</sub>. Plates were read at OD 450 nm with a SpectraMax Plus plate reader (Molecular Devices).  
191 The antibody titer is defined as the dilution in which absorbance is more than 2.1 times of the blank  
192 wells.

193

#### 194 **Flow cytometry analysis of migratory and skin LN-resident DCs after fluorescent-labeled**

195 **OVA-647 vaccination with or without heat-iMVA**

196 C57BL/6J mice were vaccinated intradermally with either Alexa Fluor 647-labeled OVA (OVA-  
197 647) alone or OVA-647 + heat-iMVA. Skin dLNs were harvested at 24 h post injection, digested  
198 with collagenase D (2.5 mg/ml) and DNase (50 µg/ml) at 37°C for 25 min before filtering  
199 through 70-µm cell strainer, and analyzed by flow cytometry for OVA-647 intensities and CD86  
200 expression of the migratory DC and resident DC populations in the skin dLNs. The antigens and  
201 clone designations for the antibodies are as follows: BioLegend: CD11c (N418). CD11b  
202 (M1/70), MHC-II (M5/114.15.2), CD3e (145-2C11), CD8a (53-6.7); BD Biosciences: Siglec F  
203 (E50-2440), CD19 (1D3), CD49b (DX5), CD207 (81E2), Thermo Fisher: CD16/CD32 (93),  
204 CD103 (2E7), TER-119 (TER-119). Cells were analyzed on the BD LSR Fortessa or LSR II  
205 flow cytometer and data were analyzed with FlowJo software (version 10.5.3).

206

207 **RNA-seq analyses of GM-CSF-cultured BMDCs infected with live MVA vs. Heat-iMVA**

208 GM-CSF-cultured BMDCs ( $1 \times 10^6$ ) from WT or STING<sup>Gt/Gt</sup> mice were infected with live MVA  
209 or heat-iMVA at a multiplicity of infection (MOI) of 10. Cells were collected at 2, 4, and 6 h  
210 post-infection. Total RNA was extracted using TRIzol (Thermo Fisher). Agilent 2100  
211 Bioanalyzer at the Rockefeller University Genomics Resource Center was used to assess total  
212 RNA integrity and quantity. Samples with the RNA integrity number (RIN) > 9.5 were used.  
213 Oligo(dT)-selected RNA was converted into cDNA for RNA sequencing using the Illumina  
214 TruSeq RNA Sample Preparation Kit v2 according to the instructions of the manufacturer and  
215 sequenced on an Illumina HiSeq 2500 platform using 100 nt single-end sequencing. Reads were  
216 aligned against the mouse genome (Gencode, GRCm38) plus vaccinia genome (VACV-MVA)  
217 using TopHat v2.0.14 (<http://tophat.cbcb.umd.edu/>). The steps described followed the protocol

218 by Trapnell and colleagues<sup>31</sup>. Cufflinks v2.1.1 (<http://cole-trapnell-lab.github.io/cufflinks/>) was  
219 used for estimation of transcript abundance and differential expression analysis. Unsupervised  
220 hierarchical clustering was performed using Euclidean distance and complete linkage for  
221 columns (samples) and rows (mRNAs). For clarity, the row dendrograms were removed from the  
222 figures. The R packages pheatmap was used for data representation. Gene set enrichment  
223 analysis (GSEA) was conducted using the package fgsea with 1000 permutations, with reactome  
224 and MSigDB C7 signature sets.

225

### 226 **Antigen cross-presentation assay**

227 GM-CSF-cultured or Flt3L-cultured BMDCs were infected or mock-infected with heat-iMVA at  
228 a MOI of 1 and then added OVA at indicated concentrations and incubated for 3 h. Cells were  
229 washed with fresh medium and co-cultured with carboxyfluorescein diacetate succinimidyl ester  
230 (CFSE)-labeled OT-1 for 3 days (BMDC:OT-1 T-cells =1:5). Flow cytometry was applied to  
231 measure CFSE intensities of OT-I cells.

232

233 WT or STING-deficient GM-CSF-cultured BMDCs were incubated with OVA in the presence or  
234 absence of either live MVA or heat-iMVA for 3 h. Cells were washed with fresh medium and co-  
235 cultured with OT-1 cells (BMDC to OT-1 T-cells ratio of 1:3) for 3 days. IFN- $\gamma$  levels in the  
236 supernatants were determined by ELISA (R&D). OT-1 cells were purified from OT-1 transgenic  
237 mice using negative selection with CD8a<sup>+</sup> T Cell Isolation Kit according to the manufacturer's  
238 instructions (Miltenyi Biotec).

239

### 240 **SARS-CoV-2 pseudovirus neutralization assay**

241 Serially diluted serum was pre-incubated with SARS-CoV-2 pseudovirus at room temperature  
242 (RT) for 30 mins, and the mixtures were added to 293T-hACE2. Medium was changed 2 h later.  
243 After 48 h, cells were fixed in 4% paraformaldehyde in PBS for 15 min at RT. Cell nuclei were  
244 stained with Hoechst 33258 (Sigma) in PBS for 10 min at RT. Images were captured using Zeiss  
245 Axio Observer 7 (Carl Zeiss) and analyzed with ZEN Imaging software (Carl Zeiss) and Image J  
246 (Fiji). GFP expression in pseudovirus-infected cells were determined using the BD LSR Fortessa  
247 flow cytometer and data were analyzed using FlowJo software (version 10.5.3).

248

## 249 **Statistics**

250 Two-tailed, unpaired, Student's *t* test was used for comparisons of two independent groups in the  
251 studies. Survival data were analyzed by log-rank (Mantel-Cox) test. The *P* values deemed  
252 significant are indicated in the figures as follows: \**P* < 0.05; \*\**P* < 0.01; \*\*\**P* < 0.001; \*\*\*\**P* <  
253 0.0001. Statistical analyses were performed on the Prism GraphPad Software. The numbers of  
254 animals included in the study are discussed in each figure legend.

255

256 **RESULTS**

257 **Co-administration of chicken ovalbumin (OVA) with heat-iMVA enhances the generation of**  
258 **OVA-specific cellular and humoral immune responses in mice**

259 We prime-immunized mice intramuscularly (IM) with the model antigen OVA with or without  
260 heat-iMVA, followed by a boost-immunization two weeks later, and euthanized them one week  
261 after the boost vaccination. IM co-administration of heat-iMVA with OVA increased splenic  
262 anti-OVA IFN- $\gamma$ <sup>+</sup>CD8<sup>+</sup> and CD4<sup>+</sup> T-cells compared with OVA alone (figure 1A-D). We also  
263 observed a stronger induction of anti-OVA IFN- $\gamma$ <sup>+</sup>CD8<sup>+</sup> and CD4<sup>+</sup> T-cells compared with OVA  
264 alone in the skin draining lymph nodes (dLNs) (Supplemental figure. 1A-D). In addition, the  
265 combination of heat-iMVA plus OVA induced stronger IgG1 production than OVA alone (figure  
266 1E). IgG2c antibody titers were upregulated by 25-fold in the OVA plus heat-iMVA group than  
267 OVA alone (figure 1F), suggesting that prime-boost vaccination with the combined heat-  
268 iMVA/OVA induced stronger Th1 immune responses.

269 **Heat-iMVA promotes more robust Th1 responses and IgG2c production compared with**  
270 **complete Freund adjuvant (CFA) and AddaVax**

271 Next, we compared the adjuvanticity of heat-iMVA with other well-known vaccine adjuvants.  
272 CFA comprises heat-killed *Mycobacterium tuberculosis* in non-metabolizable oils and also  
273 contains ligands for TLR2, 4, and 9. Injection of antigen with CFA induces a Th1-dominant  
274 immune response<sup>32</sup>. Although CFA's use in humans is currently impermissible due to its  
275 toxicity profile, it is commonly used in animal studies because of its strong adjuvant effects.  
276 Subcutaneous co-administration of OVA with heat-iMVA induced higher levels of antigen-  
277 specific CD8<sup>+</sup> and CD4<sup>+</sup> T-cells than OVA plus CFA in the spleens of vaccinated mice (figure  
278 2A and 2C). Similarly, co-administration of OVA with heat-iMVA induced stronger OVA-

279 specific CD8<sup>+</sup> and CD4<sup>+</sup> T cell responses in skin dLNs compared with OVA + CFA  
280 (Supplemental figure. 2A and 2B). Serum IgG1 titers from OVA + CFA-immunized mice were  
281 6-fold higher than those in the serum from OVA + heat-iMVA-immunized mice (Fig 2C),  
282 whereas serum IgG2c titers from OVA + CFA-immunized mice were 10-fold lower than those in  
283 the serum of OVA + heat-iMVA-immunized mice (Fig 2D). These results indicate that co-  
284 administration of OVA plus Heat-iMVA promotes stronger Th1-biased humoral immunity than  
285 OVA plus CFA.

286 MF59, a squalene-based oil-in-water vaccine adjuvant in the inactivated influenza vaccine Flud,   
287 is also the adjuvant in subunit vaccines against SARS-CoV-2 <sup>33</sup>. AddaVax is an MF59-like  
288 preclinical grade nano-emulsion that induces both Th1-cellular immune responses and Th2-  
289 biased humoral responses <sup>34</sup>. Intramuscular (IM) vaccination with OVA plus heat-iMVA induced  
290 CD8<sup>+</sup> T cell responses similar to OVA plus AddaVax, however, the former combination  
291 promoted higher CD4<sup>+</sup> T cell responses than the latter (figure 2A and 2B). IM vaccination of  
292 OVA plus heat-iMVA induced 7-fold higher OVA-specific IgG2c titers (figure 2C) and 7-fold  
293 lower OVA-specific IgG1 than OVA plus AddaVax (figure 2D), suggesting that co-  
294 administration of the antigen plus heat-iMVA more potently induces antigen-specific Th1-biased  
295 cellular and humoral immune responses compared with combining the antigen with AddaVax.  
296 Overall, SC or IM co-administration of OVA with heat-iMVA generated similar cellular and  
297 humoral immune responses to OVA (figure 2A-D; Supplemental figure. 2A and 2B).

298

299 **The role of CD103<sup>+</sup> /CD8α<sup>+</sup> DCs and the STING pathway on heat-iMVA-induced vaccine**  
300 **adjuvant effects**

301 BATF3 is a transcription factor critical for the development of CD103<sup>+</sup>/CD8 $\alpha$ <sup>+</sup> lineage DCs,  
302 which plays an essential role in cross-presenting viral and tumor antigens<sup>35</sup>. Our results showed  
303 that the percentage of anti-OVA IFN- $\gamma$ <sup>+</sup> T-cells among splenic CD8<sup>+</sup> T-cells induced by heat-  
304 iMVA was reduced in Batf3<sup>-/-</sup> mice (figure 3A), whereas the generation of splenic anti-OVA  
305 IFN- $\gamma$ <sup>+</sup> CD4<sup>+</sup> T-cells seemed unaffected (figure 3B), with minimal effects on the IgG1 and IgG2c  
306 production (figure 3C and 3D). These results support a role for Batf3-dependent CD103<sup>+</sup>/CD8 $\alpha$ <sup>+</sup>  
307 DCs in cross-presenting OVA antigen to generate OVA-specific splenic CD8<sup>+</sup> T-cells in our  
308 vaccination model. STING agonist cGAMP can be used as a vaccine adjuvant<sup>36</sup>. Here, we  
309 observed that the percentage of splenic anti-OVA IFN- $\gamma$ <sup>+</sup> CD8<sup>+</sup> and CD4<sup>+</sup> T-cells induced by  
310 heat-iMVA decreased in STING<sup>Gt/Gt</sup> mice (figure 3A and 3B). Moreover, serum IgG2c titers  
311 were reduced by 10-fold in the STING<sup>Gt/Gt</sup> mice vaccinated with OVA + heat-iMVA compared  
312 with immunized WT mice (figure 3D), while serum IgG1 titers did not significantly differ  
313 between the two groups (figure 3C). These results demonstrate that the cGAS/STING-mediated  
314 cytosolic DNA-sensing pathway plays a critical role in the vaccine adjuvant effects of heat-  
315 iMVA.

316

### 317 **Co-incubation of BMDCs with heat-iMVA and soluble OVA enhances antigen cross-** 318 **presentation and proliferation of OT-I T-cells in vitro**

319 Pre-incubation of GM-CSF-cultured BMDCs with heat-iMVA followed by pulsing with OVA  
320 enhanced the capacity of BMDCs to stimulate the proliferation of OT-I T-cells at all OVA  
321 concentrations, as indicated by CFSE dilution in the dividing cells (figure. 4A and 4B). Heat-  
322 iMVA potently stimulated Flt3L-BMDCs' abilities to cross-present OVA and promote the

323 proliferation of OT-I cells, even at an OVA concentration of 0.01 mg/ml (figure. 4C and 4D). In  
324 addition, GM-CSF-cultured BMDCs pre-infected with heat-iMVA were more potent in cross-  
325 presenting OVA antigen and stimulating IFN- $\gamma$  secretion from proliferated and activated OT-I  
326 cells than BMDCs pre-infected with live MVA (figure 4E). IFN- $\gamma$  levels were much lower in  
327 STING-deficient DCs than in WT DCs pretreated with heat-IMVA plus OVA and co-cultured  
328 with OT-I cells (figure 4E). Similar reduction of IFN- $\gamma$  secretion by OT-1 cells were obtained in  
329 cGAS-deficient GM-CSF-cultured BMDCs compared with WT DCs (figure 4G). To test whether  
330 the STING/IFNAR pathway is important for heat-iMVA-induced antigen cross-presentation in  
331 CD103<sup>+</sup> DCs, we sorted CD103<sup>+</sup> DCs from Flt3L-cultured BMDCs from WT, STING<sup>Gt/Gt</sup>, or  
332 IFNAR<sup>-/-</sup> mice, and preformed antigen cross-presentation assay. IFN- $\gamma$  levels were much lower in  
333 heat-iMVA-infected STING-deficient or IFNAR<sup>-/-</sup> CD103<sup>+</sup> DCs than WT CD103<sup>+</sup> DCs (figure  
334 4F). These results indicate that the STING/IFNAR pathway plays a vital role in heat-iMVA-  
335 induced, CD103<sup>+</sup> DCs-mediated antigen cross-presentation and antigen-specific T cell  
336 proliferation and activation. Finally, we tested whether IFNAR signaling on OT-I cells plays a  
337 role in T cell activation and we observed that IFNAR<sup>-/-</sup> OT-1 cells secreted lower amount of  
338 IFN- $\gamma$  when stimulated with OVA-pulsed heat-iMVA-treated GM-CSF-BMDCs (figure 4G).

339

### 340 **Heat-iMVA infection of BMDCs induces STING-dependent IFN and inflammatory** 341 **cytokine responses**

342 We performed RNA-seq analyses of BMDCs from WT and STING<sup>Gt/Gt</sup> mice infected with either  
343 live MVA or heat-iMVA for 2, 4, and 6 h. Our results showed several patterns of gene  
344 expression induced by MVA and heat-iMVA: (i) Infection with live MVA, but not heat-iMVA,  
345 induced a subset of host genes in a STING-independent manner, thus indicating gene induction



346 by a live virus infection (figure 5A, marked as a1-2); (ii) Heat-iMVA induced higher levels of a  
347 large subset of IFN-regulated genes than live MVA, which were mainly dependent on STING  
348 (figure 5A, marked as b1-3); and (iii) Heat-iMVA infection induced higher levels of a relatively  
349 small subset of genes than MVA, which were independent of STING (figure 5A, marked as c).  
350 Selected examples of genes in each category are shown in figure 5B. For example, heat-iMVA  
351 infection triggered higher levels of IFN-inducible genes than MVA, including *Ifih1* (*MDA5*),  
352 *Ddx58* (*RIG-1*), *Oasl2*, *Oas3*, *TLR3*, *Nod1*, *Ifna4*, *Ifnb1*, *Ccl5*, *Cxcl9*, *Cxcl10*, and members of  
353 the guanylate binding protein (Gbp) family, as largely dependent on STING (figure 5B, marked  
354 as b). These results indicate that the activation of the cytosolic DNA-sensing pathway by heat-  
355 iMVA also triggers the up-regulation of genes involved in the cytosolic RNA-sensing pathway in  
356 addition to other antiviral genes, thereby strengthening a broad range of innate immunity.  
357  
358 MVA infection of BMDCs resulted in the temporal expression of viral RNAs, as shown by the  
359 unbiased hierarchical cluster analysis (figure 5C), consistent with published results of RNAseq  
360 of WT VAC-infected HeLa cells<sup>37</sup>. By contrast, heat-iMVA infection of cDCs did not result in  
361 significant levels of viral transcripts detected by the RNA-seq method (data not shown). Gene  
362 Set Enrichment Analyses (GSEA) confirmed that heat-iMVA-induced IFN- $\alpha$ , IFN- $\gamma$ ,  
363 inflammatory responses, and IL-6/JAK/STAT3 signaling in WT BMDCs but not in STING-  
364 deficient DCs (figure 5D). STING-dependent induction of *Ifna4*, *Ifnb1*, *Cd40*, and *Irf7* in heat-  
365 iMVA in BMDCs are shown in figure 5E. Together, RNA-seq analyses showed that heat-iMVA  
366 is more immune-stimulatory likely due to the lack of expression of viral inhibitory genes, and  
367 heat-iMVA-induction of type I IFN and IFN stimulated genes (ISGs) is largely dependent on  
368 STING.

369

370 **Heat-iMVA promotes migratory DC trafficking and maturation of resident DCs in the skin**

371 **dLNs**

372 The DC lineage is heterogeneous and composed of migratory and resident DCs<sup>38</sup>. Migratory  
373 DCs capture antigens in the peripheral tissue and then mature, followed by migration to the  
374 draining lymph nodes, where they present antigens to naïve T cells. They can also transfer  
375 antigens to resident DCs<sup>39,40</sup>. We analyzed various DC populations in skin dLNs after  
376 vaccination using a similar gating strategy as reported<sup>41</sup>. First, we were able to confirm six  
377 distinct DC populations in the skin dLNs: (i) MHC-II<sup>+</sup>CD11c<sup>+</sup> migratory DCs and MHC-  
378 II<sup>Int</sup>CD11c<sup>+</sup> resident DCs; (ii) migratory DCs further separated into CD11b<sup>+</sup> DCs, Langerin<sup>-</sup>  
379 CD11b<sup>-</sup> DCs, and Langerin<sup>+</sup> DCs (CD103<sup>+</sup> DCs and Langerhans cells); and (iii) resident DCs  
380 composed of CD8α<sup>+</sup> lymphoid-resident DCs and CD8α<sup>-</sup> lymphoid-resident DCs ([Supplemental](#)  
381 [figure 3](#)). Second, we tested which DCs subsets efficiently phagocytosing OVA antigen labeled  
382 with an Alexa Fluor 647 dye (OVA-647) and have the capacity to migrate to the skin dLNs. We  
383 intradermally injected OVA-647 into the right flanks of mice and harvested the skin dLNs at 24  
384 h post-injection. Consistent with a previous report showing that migratory DCs are responsible  
385 for transferring antigens to skin draining LN<sup>42</sup>, we observed that OVA-647 was mostly found in  
386 the three types of migratory DCs, including CD11b<sup>+</sup>, CD103<sup>+</sup>, and CD11b<sup>-</sup>CD103<sup>-</sup> DCs, but  
387 rarely detected in resident DCs ([figure 6A and 6C](#)). Co-administration of OVA-647 with heat-  
388 iMVA increased the percentage of OVA-647<sup>+</sup> CD11b<sup>+</sup>, CD103<sup>+</sup>, CD11b<sup>-</sup>CD103<sup>-</sup>, and CD8α<sup>+</sup>  
389 DCs, compared with injection of OVA-647 alone ([figure 6C and 6E](#)). These results suggest that  
390 co-administration of OVA-647 with heat-iMVA enhances the capacity of migratory DCs to  
391 transport phagocytosed antigen to the skin dLNs and facilitates the antigen transfer from

392 migratory DCs to CD8 $\alpha^+$  DCs, a lymphoid-resident DC population critical for antigen cross-  
393 presentation. Migratory DCs expressed higher levels of CD86 maturation marker than resident  
394 DCs (figure 6B and 6D). Intradermal vaccination with OVA plus heat-iMVA induced higher  
395 levels of CD86 on resident DCs (CD8 $^+$  DC or CD8 $^-$  DC) than with OVA alone (figure 6D and  
396 6F). By contrast, heat-iMVA co-administration did not change the maturation status of migratory  
397 DCs entering skin draining LNs (figure 6D and 6F). Our results indicate that intradermal co-  
398 administration of heat-iMVA with OVA antigen promotes antigen-carrying migratory DCs  
399 trafficking into the skin draining LN and transferring of antigens from migratory DCs to CD8 $\alpha^+$   
400 DCs and induce resident DC maturation.

#### 401 **Co-administration of tumor neoantigen peptides with heat-iMVA improves antitumor** 402 **effects in a murine therapeutic vaccination model**

403 Here, we tested whether therapeutic vaccination with neoantigen peptides plus heat-iMVA would  
404 delay tumor growth in a murine B16-F10 melanoma model. Three days after B16-F10 cells were  
405 implanted, we subcutaneously co-administered melanoma neoantigen peptides (M27, M30, and  
406 M48) plus heat-iMVA twice, four days apart, and monitored tumor growth and mouse survival  
407 (figure 7A). Neoantigen peptides alone only minimally delayed tumor growth (figure 7B-7D).  
408 However, co-administration of neoantigen peptides with heat-iMVA cured B16-F10 melanoma  
409 in 30% of treated mice and prolonged the median survival (figure 7B, 7D, and 7E). Likewise, co-  
410 administration of poly(I:C) (50  $\mu$ g) with neoantigen peptides also improved therapeutic vaccine  
411 efficacy with potency similar to heat-iMVA (figure 7B, 7D, and 7F). We did, however, observe  
412 side effects, including weight loss in the poly(I:C) group (but not with heat-iMVA). These results

413 indicate that heat-iMVA could be a safe and potent vaccine adjuvant that eradicates or delays  
414 tumor growth in a murine therapeutic vaccination model.

415

#### 416 **Heat-iMVA is a potent immune adjuvant for irradiated whole-cell vaccines**

417 Use of irradiated whole-cell vaccines bypass the need to identify tumor-associated antigens or  
418 neoantigens and allows presentation of multiple tumor antigens for recognition by the host immune  
419 system. Here, mice were intradermally implanted with B16-F10 melanoma cells. After three days,  
420 mice were vaccinated subcutaneously with either irradiated B16-GM-CSF cells alone, irradiated  
421 B16-GM-CSF + heat-iMVA, or irradiated B16-GM-CSF + poly(I:C) on the contralateral flanks  
422 twice, four days apart ([Supplemental figure 4A](#)). Vaccination with irradiated B16-GM-CSF +  
423 heat-iMVA cured 30% of tumor-bearing mice and extended the median survival, which was more  
424 efficacious than using poly(I:C) as a vaccine adjuvant ([Supplemental figure 4B and 4C](#)). These  
425 results indicate that heat-iMVA is a potent vaccine adjuvant for irradiated whole-cell vaccination.

426

#### 427 **Co-administration of heat-iMVA with SARS-CoV2 spike protein promotes robust** 428 **neutralizing antibody production**

429 Here, we tested whether co-administration of recombinant spike protein with heat-iMVA  
430 generates anti-spike neutralizing antibodies. Our results showed that vaccination with spike  
431 protein alone slightly induced anti-spike IgG1 and IgG2c antibodies ([Supplemental figure 5A](#)  
432 [and 5B](#)), while co-administration of spike protein + heat-iMVA increased IgG1 levels by 20-fold  
433 and IgG2c levels by 250-fold compared with vaccination with spike protein alone ([Supplemental](#)  
434 [figure 5A and 5B](#)). To investigate whether vaccination-induced antibodies could block SARS-  
435 CoV-2 infection, we performed a neutralization assay using a SARS-CoV-2 pseudovirus.

436 Without any pretreatment, the SARS-CoV-2 pseudovirus carrying the gene encoding GFP  
437 efficiently infected human ACE2-expressing HEK293T cells, as shown by the GFP<sup>+</sup> cells  
438 ([Supplemental figure 5C](#)). Pretreatment with serum from the spike + heat-iMVA group at 1:100  
439 dilution efficiently blocked SARS-CoV-2 pseudovirus infection, whereas pretreatment with  
440 serum from the spike alone group only weakly reduced pseudovirus infection ([Supplemental](#)  
441 [figure 5C](#)). Flow cytometry analysis of GFP<sup>+</sup> cells confirmed our observation ([Supplemental](#)  
442 [figure 5D](#)). Serum neutralizing antibody titers in the two vaccination groups and a PBS-mock  
443 vaccination group was determined ([Supplemental figure 5D and 5E](#)). ID<sub>50</sub> (50% inhibitory  
444 dose) was defined as the reciprocal of the serum dilution that caused a 50% reduction of GFP<sup>+</sup>  
445 cells compared with mock-treated samples. The serum neutralizing antibody titers (ID<sub>50</sub>) from  
446 spike + heat-iMVA group were 10-fold higher than those from the spike alone group  
447 ([Supplemental figure 5F](#)). Overall, our results indicate that heat-iMVA boosts the production of  
448 neutralizing antibodies when combined with the recombinant spike protein from SARS-CoV-2.

449 **DISCUSSION**

450 In this study, we explored the use of heat-iMVA as a vaccine adjuvant for protein- or  
451 peptide-based subunit vaccines against cancers and infectious agents. MVA is an approved  
452 vaccine against smallpox, and a potential vaccine vector with an excellent safety profile.  
453 However, MVA expresses many immune-suppressive genes. Heat-iMVA preserves the ability to  
454 enter DCs but fails to express viral genes, thus inducing much higher levels of type I IFN and  
455 ISGs than live MVA. Here, we demonstrated that co-administration of heat-iMVA with soluble  
456 proteins or peptides generates Th1-biased cellular and humoral immune responses superior to  
457 known adjuvants, including CFA and AddaVax. In a murine therapeutic vaccination model, co-  
458 delivery of heat-iMVA with three B16-F10 neoantigen peptides delayed tumor growth and cured  
459 30% of tumor-bearing mice, with similar efficacy as poly(I:C), but with less toxicity. Taken  
460 together, our results support the use of heat-iMVA as a vaccine adjuvant.

461  
462 DCs are essential for priming naïve T cells to generate adaptive immune responses, and  
463 therefore are the primary targets of vaccine adjuvants<sup>11 43-46</sup>. RNA-seq analyses of host  
464 transcriptomes of DCs infected with either live MVA or heat-iMVA revealed heat-iMVA as a  
465 more potent STING agonist than live MVA, inducing large subsets of genes involved in type I  
466 and type II IFN and inflammatory responses. We previously showed that heat-iMVA infection of  
467 BMDCs induced DC maturation in a STING-dependent manner<sup>25</sup>. Consistent with this, we now  
468 find that heat-iMVA infection of BMDCs promotes antigen cross-presentation, which requires  
469 STING. Barnowski et al. showed that the STING pathway contributes to the generation of  
470 vaccinia immunodominant B8-specific CD8<sup>+</sup> T cell, but not to anti-OVA CD8<sup>+</sup> T cell responses,  
471 after intraperitoneal vaccination with MVA expressing OVA<sup>47</sup>. Together, these results show that

472 the STING pathway is involved in poxvirus-induced antiviral adaptive immunity as well as the  
473 poxvirus-mediated adjuvant effect.

474 Using Batf3<sup>-/-</sup> mice, we also demonstrated that heat-iMVA-boosted antigen-specific  
475 CD8<sup>+</sup> T cell responses are dependent on cDC1s, also known as CD103<sup>+</sup>/CD8 $\alpha$ <sup>+</sup> DCs. However,  
476 heat-iMVA-boosted antigen-specific CD4<sup>+</sup> T cell responses were not lost in Batf3<sup>-/-</sup> mice,  
477 suggesting that cDC2s, also known as CD11b<sup>+</sup> DCs, might be responsible for antigen  
478 presentation via MHC-II. Kastenmüller et al. investigated the role of Batf3-dependent  
479 CD103<sup>+</sup>/CD8 $\alpha$  DCs in protein-TLR7/8 agonist conjugate and they found that CD8<sup>+</sup> T cell  
480 responses were significantly reduced in Batf3 KO mice, whereas CD4<sup>+</sup> T cell responses were not  
481 affected<sup>48</sup>. Interestingly, heat-iMVA-boosted antigen-specific antibody responses were not  
482 affected in Batf3<sup>-/-</sup> mice. This finding is consistent with a recent report that migratory CD11b<sup>+</sup>  
483 DCs (cDC2s) are required for priming T follicular helper (Tfh) cells, a subset of CD4<sup>+</sup> T cells,  
484 for antigen-specific antibody production<sup>49</sup>.

485

486 An increasing body of evidence indicates that STING agonists can function as potent  
487 vaccine adjuvants<sup>9 10 36 50-52</sup>. To probe the role of the STING-mediated cytosolic DNA-sensing  
488 pathway in heat-iMVA adjuvanticity, we used STING<sup>Gt/Gt</sup> mice, which lack functional STING<sup>53</sup>.  
489 Our results demonstrate that STING contributes to the generation of antigen-specific IFN- $\gamma$ <sup>+</sup>  
490 CD8<sup>+</sup> and CD4<sup>+</sup> T cells and IgG2c antibody production potentiated by heat-iMVA. Given the  
491 essential roles of cDC1 and cDC2 in mediating CD8<sup>+</sup> and CD4<sup>+</sup> T cell priming, we surmise that  
492 STING signaling in cDC1 and cDC2 is important for heat-iMVA-induced immunogenicity. We  
493 note three major differences between heat-iMVA and small-molecule chemical STING agonists:  
494 (i) heat-iMVA enters cells naturally<sup>24</sup>, whereas chemical STING agonists need lipophilic

495 mediators to facilitate their entry; (ii) heat-inactivated vaccinia can also trigger type I IFN  
496 production in pDCs via a TLR7/TLR9/MyD88-dependent pathway<sup>24,26</sup>, whereas chemical  
497 STING agonists are specific to the STING pathway; and (iii) heat-iMVA activates other danger  
498 signals, including the Absent In Melanoma 2 (AIM2) inflammasome<sup>(54)</sup> and data not shown),  
499 which might also be important for heat-iMVA adjuvanticity. Our results showed that SC heat-  
500 iMVA co-administration with OVA-647 significantly increased OVA-647<sup>+</sup> migratory DCs in the  
501 dLNs. Interestingly, heat-iMVA also increased OVA-647<sup>+</sup> CD8 $\alpha$ <sup>+</sup> DCs in the dLNs. Although  
502 migratory DCs in the dLNs exhibited high CD86 expression with or without heat-iMVA as a  
503 vaccine adjuvant, heat-iMVA co-delivery resulted in higher expression of CD86 on resident  
504 DCs, including both CD8<sup>+</sup> DCs and CD8<sup>-</sup> DCs. These results suggest that heat-iMVA co-  
505 administration promotes peripheral DC maturation and migration into dLNs, as well as LN-  
506 resident DC maturation. We speculate that some heat-iMVA virions (together with OVA-647<sup>+</sup>)  
507 might be transported, via the LN conduits, to the LN interior to resident DCs, as demonstrated  
508 for subcutaneously injected vaccinia virus or MVA<sup>55</sup>.

509       Limitations of the study include but are limited to the following: (i) vaccination studies  
510 were performed in female C57BL/6J mice at 6-8 weeks of age. Potential age, sex, and species  
511 bias cannot be excluded; Because the Batf3 and STING-deficient mice are in C57BJ/6J  
512 background, we chose this strain for our study; (ii) we did not analyze what cell populations are  
513 infected by heat-iMVA after vaccination, because heat-iMVA does not produce viral proteins;  
514 we plan to do more sophisticated analyses with immune-activating recombinant MVA  
515 expressing fluorescent markers in our future studies; and (iii) we did not explore whether antigen  
516 conjugation to heat-iMVA or mixing antigen with Addavax plus heat-iMVA would further  
517 enhance immune efficacy in this study.



518 Nörder et al. investigated whether MVA could be used as a vaccine adjuvant, and they  
519 found that IM co-administration of MVA and OVA enhances the generation of antigen-specific  
520 antibody and T cell responses <sup>56</sup>. MVA is non-replicative in most mammalian cells and heat-  
521 inactivation makes it safer and more immunogenic.

522 In conclusion, we envision that heat-iMVA can be used as a vaccine adjuvant for  
523 neoantigen-based or irradiated whole cell-based cancer vaccines based on its safety and  
524 immunogenicity. Heat-iMVA activation of STING signaling contributes to its adjuvanticity and  
525 heat-iMVA promotes antigen cross-presentation by Batf3-dependent CD103<sup>+</sup>/CD8 $\alpha$ <sup>+</sup> DCs to  
526 induce antigen-specific CD8<sup>+</sup> T cell responses. Future work will focus on identifying viral  
527 inhibitors of the cGAS/STING pathway encoded by the MVA genome and engineering  
528 recombinant MVA to improve its immunogenicity and adjuvanticity.

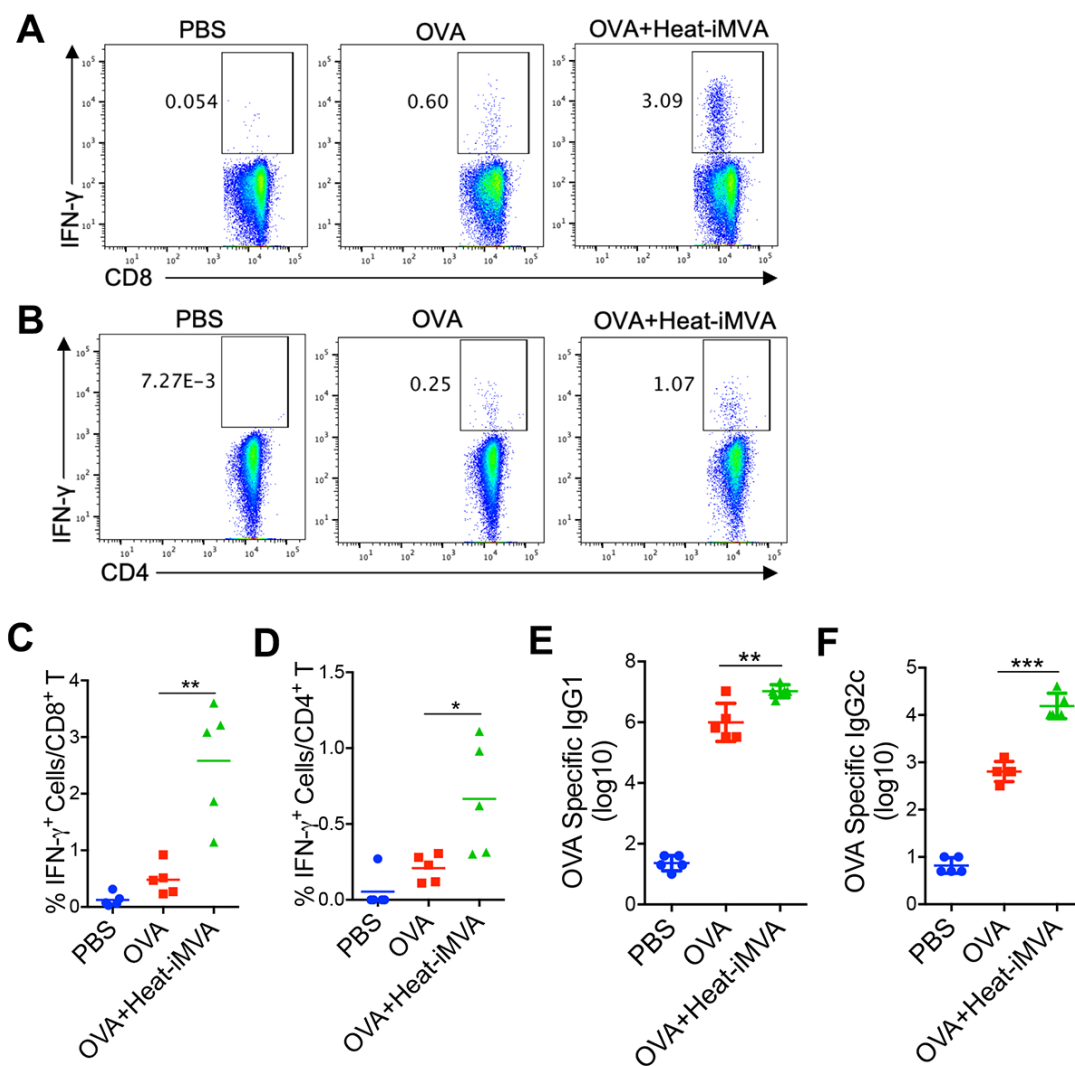

529 **Figure 1. Co-administration of heat-inactivated MVA (heat-iMVA) enhances antigen-**  
530 **specific T cell and antibody responses after intramuscular (IM) vaccination with chicken**  
531 **ovalbumin (OVA).** WT C57BL/6J mice were vaccinated on day 0 and day 14 with OVA (10  
532  $\mu\text{g}$ ) or OVA (10  $\mu\text{g}$ ) plus heat-iMVA (an equivalent amount of  $10^7$  pfu/mouse) intramuscularly.  
533 On day 21, splenocytes (A, B, C, D) were stimulated with OVA<sub>257-264</sub> (A, C) or OVA<sub>323-339</sub>  
534 peptide (B, D). The expression of IFN- $\gamma$  by CD8<sup>+</sup> T cells or CD4<sup>+</sup> T was measured by flow  
535 cytometry. (E-F) OVA-specific immunoglobulin G1 (IgG1) or OVA-specific immunoglobulin  
536 G2c (IgG2c) titers in the serum from PBS, OVA, or OVA + heat-iMVA-vaccinated mice were  
537 determined by ELISA. Data are represented as mean  $\pm$  SEM ( $n = 3-5$ ; \* $P < 0.05$ , \*\* $P < 0.01$  and  
538 \*\*\* $P < 0.001$ ; unpaired  $t$  test). Data are representative of three independent experiments.

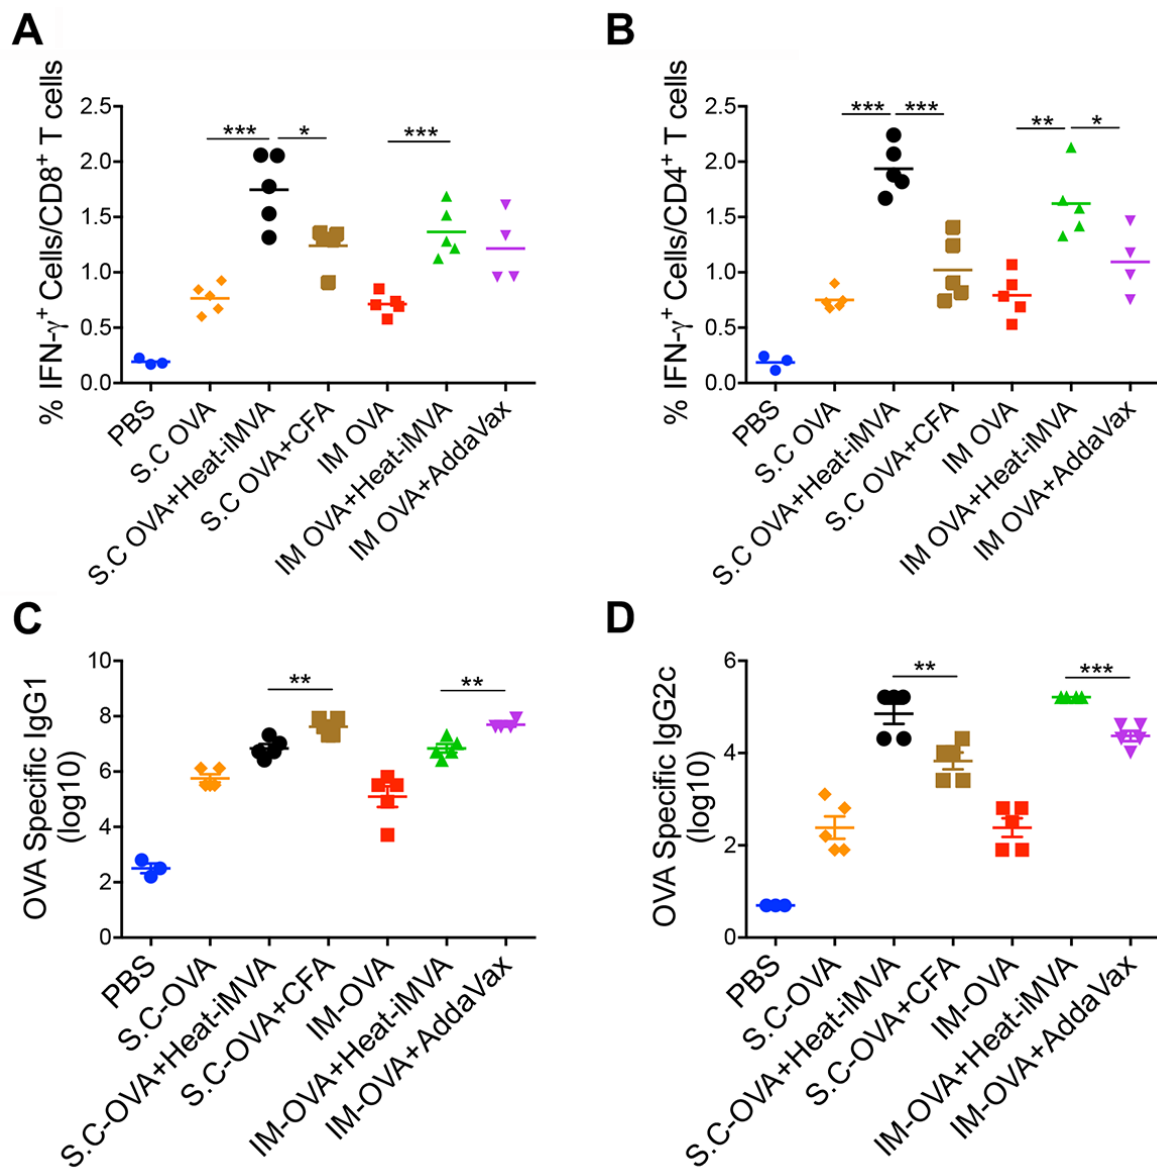

539 **Figure 2. Heat-iMVA promotes stronger antigen-specific Th1 responses and IgG2c**  
540 **production compared with complete Freund adjuvant (CFA) and AddaVax after cutaneous**  
541 **vaccination.** Antigen-specific T cell and antibodies responses were measured after intramuscular  
542 (IM) or subcutaneous (SC) vaccination on day 0 and day 14 with OVA (10  $\mu$ g) in the presence or  
543 absence of heat-iMVA (an equivalent amount of  $10^7$  pfu) in C57BL/6J mice. (A-B) On day 21,  
544 splenocytes were stimulated with OVA<sub>257-264</sub> or OVA<sub>323-339</sub>. The expression of IFN- $\gamma$  by CD8<sup>+</sup> or  
545 CD4<sup>+</sup> T T cells was measured by flow cytometry. (C-D) On day 21, OVA-specific  
546 immunoglobulin G1 (IgG1) or OVA-specific immunoglobulin G2c (IgG2c) titers in the were  
547 determined by ELISA. Data are represented as mean  $\pm$  SEM ( $n = 3-5$ ; \* $P < 0.05$ , \*\* $P < 0.01$  and  
548 \*\*\* $P < 0.001$ ; unpaired  $t$  test). Data are representative of two independent experiments.

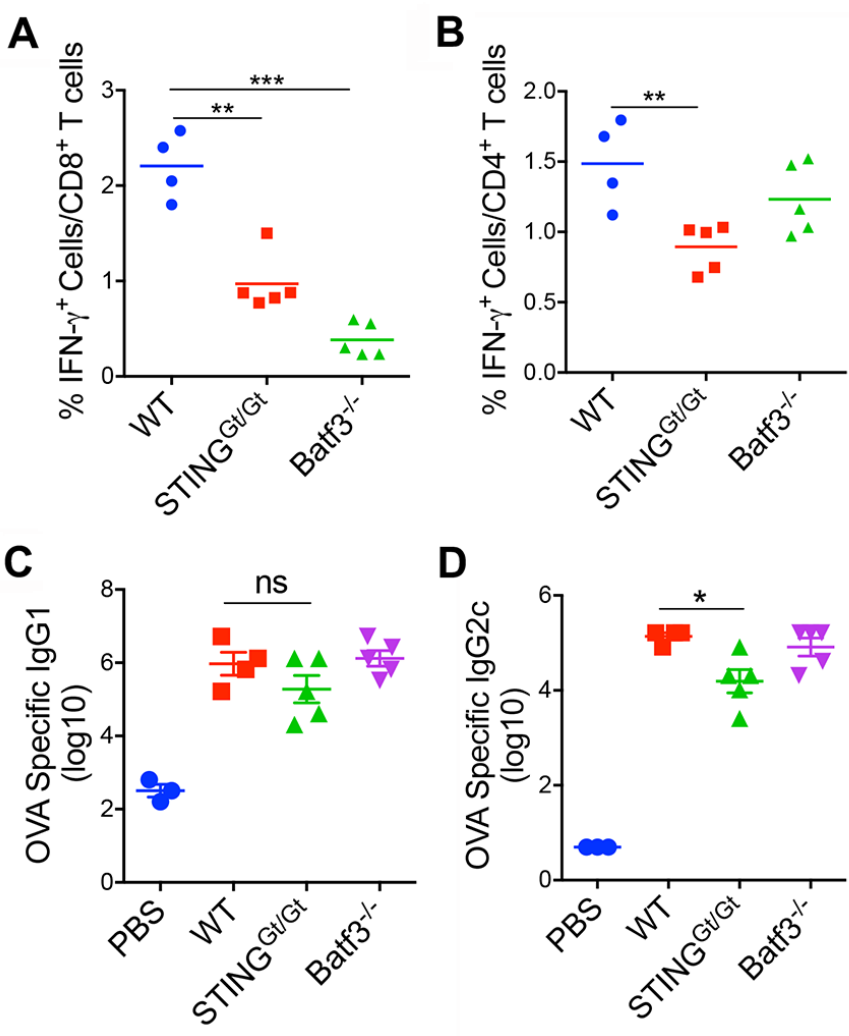

549 **Figure 3. CD103<sup>+</sup> DC and the cGAS/STING pathway contribute to heat-iMVA**  
550 **adjuvanticity.** STING<sup>Gt/Gt</sup>, Batf3<sup>-/-</sup>, or age-matched WT C57BL/6J mice were intramuscularly  
551 vaccinated on day 0 and day 14 with OVA (10 µg) + heat-iMVA (an equivalent of 10<sup>7</sup> pfu). (A-  
552 B) On day 21, mice were euthanized, and spleens and blood were collected. splenocytes were  
553 stimulated with OVA<sub>257-264</sub> or OVA<sub>323-339</sub>. The expression of IFN-γ by CD8<sup>+</sup> or CD4<sup>+</sup> T cells was  
554 measured by flow cytometry. (C-D) On day 21, OVA-specific immunoglobulin G1 (IgG1) or  
555 OVA-specific immunoglobulin G2c (IgG2c) titers in the serum were determined by ELISA. Data  
556 are represented as mean ± SEM (*n* = 3-5; \**P* < 0.05, \*\**P* < 0.01 and \*\*\**P* < 0.001; unpaired *t* test).  
557 Data are representative of three independent experiments.

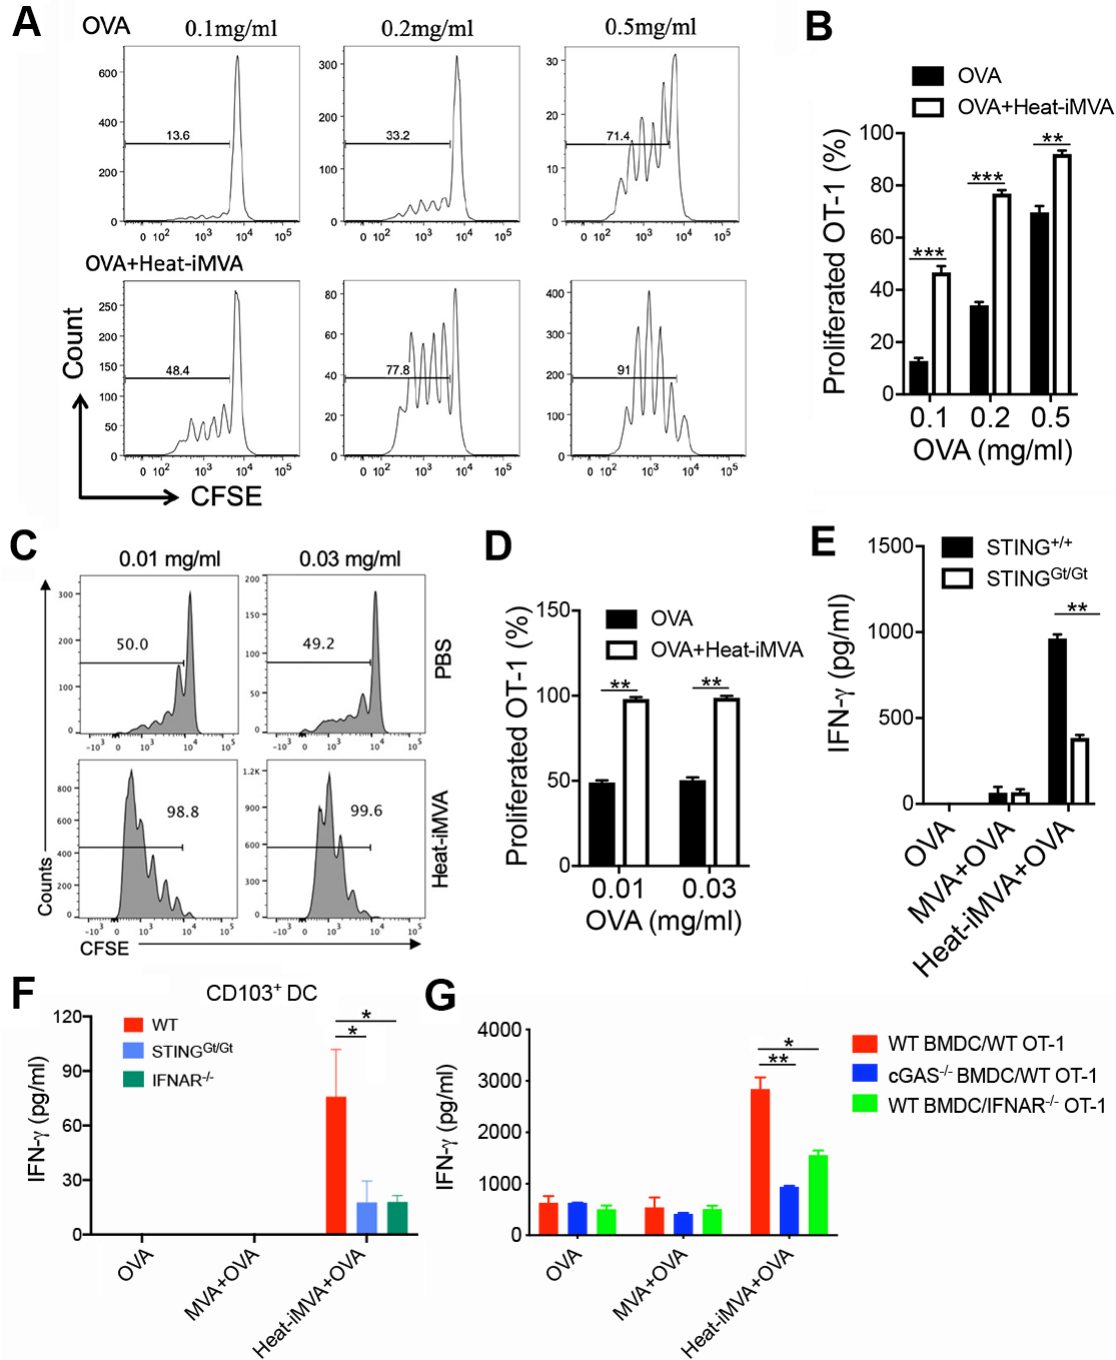



558 **Figure 4. Heat-iMVA promotes OT-I cell activation and proliferation mediated by OVA**  
559 **cross-presentation by dendritic cells in vitro.** (A, B, C, D) Proliferation of CFSE-labeled OT-I  
560 T cells after incubation with GM-CSF-cultured BMDCs (A, B) or FLT3L-cultured dendritic cells  
561 (C, D) pulsed with OVA in the presence or absence of heat-iMVA. BMDCs were incubated with  
562 or without heat-iMVA, and then co-cultured with CFSE-labeled OT-I cells for 3 days. (E) IFN- $\gamma$   
563 secretion from OT-I T cells after incubation with GM-CSF-cultured WT or STING<sup>Gt/Gt</sup> BMDCs  
564 pulsed with OVA in the presence or absence of live MVA or heat-iMVA. (F) IFN- $\gamma$  secretion  
565 from OT-I T cells after incubation with sorted CD103<sup>+</sup> DCs from WT, STING<sup>Gt/Gt</sup>, or IFNAR<sup>-/-</sup>  
566 Flt3L-cultured BMDCs pulsed with OVA in the presence or absence of live MVA or heat-  
567 iMVA. (G) IFN- $\gamma$  secretion from WT or IFNAR<sup>-/-</sup> OT-I T cells after incubation with OVA-  
568 pulsed GM-CSF-cultured DCs from WT or cGAS<sup>-/-</sup> mice with or without live MVA or heat-  
569 iMVA. Data are represented as mean  $\pm$  SEM ( $n = 3-5$ ; \*\* $P < 0.01$  and \*\*\* $P < 0.001$ ; unpaired  $t$   
570 test). Data are representative of three independent experiments.

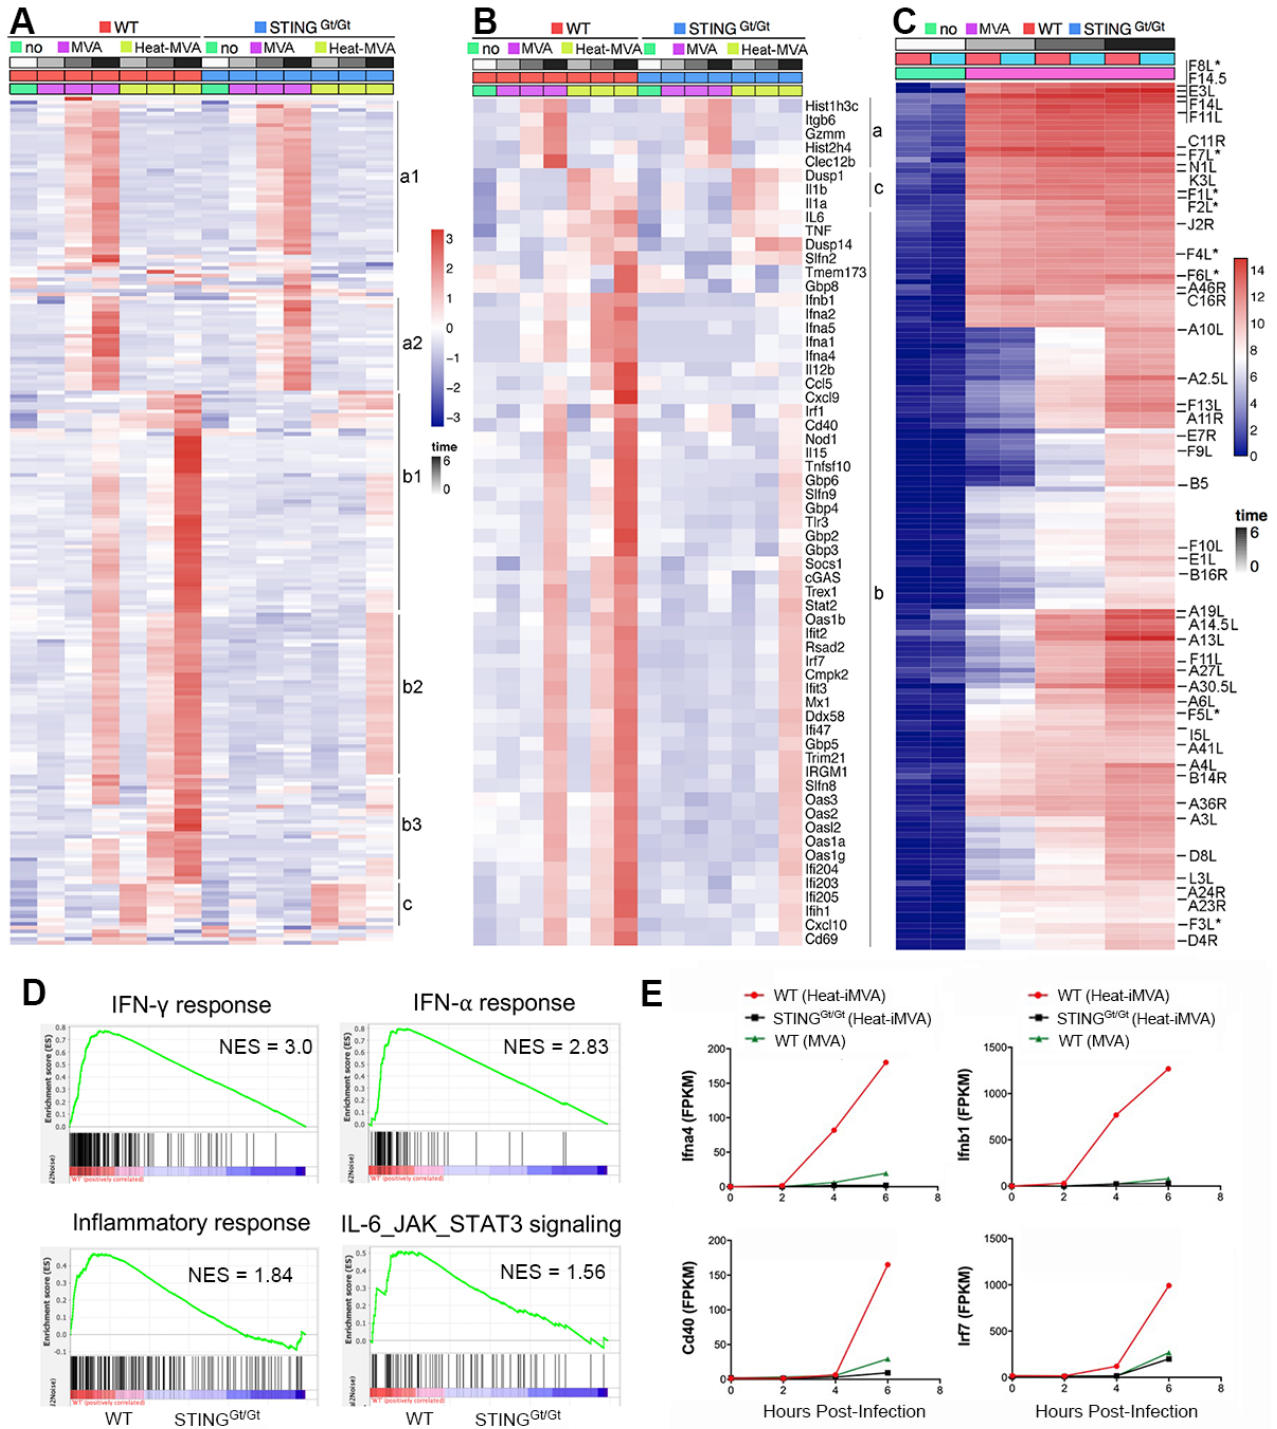

571 **Figure 5. Time-resolved transcriptome profiling of WT or STING<sup>Gt/Gt</sup> BMDCs infected**  
572 **with either live MVA or heat-iMVA.** (A) A heat map of a one-way hierarchical clustering  
573 analysis of the top 200 genes ranked by Z-score of log<sub>2</sub>RPKM, indicating genes that exhibited  
574 the most statistically significant changes in gene expression over the course of the experiment.  
575 Several clusters of genes with similar gene expression changes were observed (indicated as a1-2,  
576 b1-3, and c). (B) A heat map of a subset of genes from panel A, showing IFN-regulated genes  
577 and genes involved in inflammation. (C) A heat map of a one-way hierarchical cluster analysis of  
578 MVA transcriptome, using log<sub>2</sub> RPKM, illustrating the temporal pattern of viral gene expression  
579 changes. (D) Gene set enrichment analyses (GSEA) showing differences of gene expression in  
580 several pathways including IFN- $\gamma$ , IFN- $\alpha$ , inflammatory responses, and IL-6\_JAK\_STAT3  
581 signaling. (E) Representative examples of heat-iMVA or live MVA-induced *Ifna4*, *Ifnb*, *Cd40*,  
582 and *Irf7* transcripts in WT and STING<sup>Gt/Gt</sup> BMDCs.

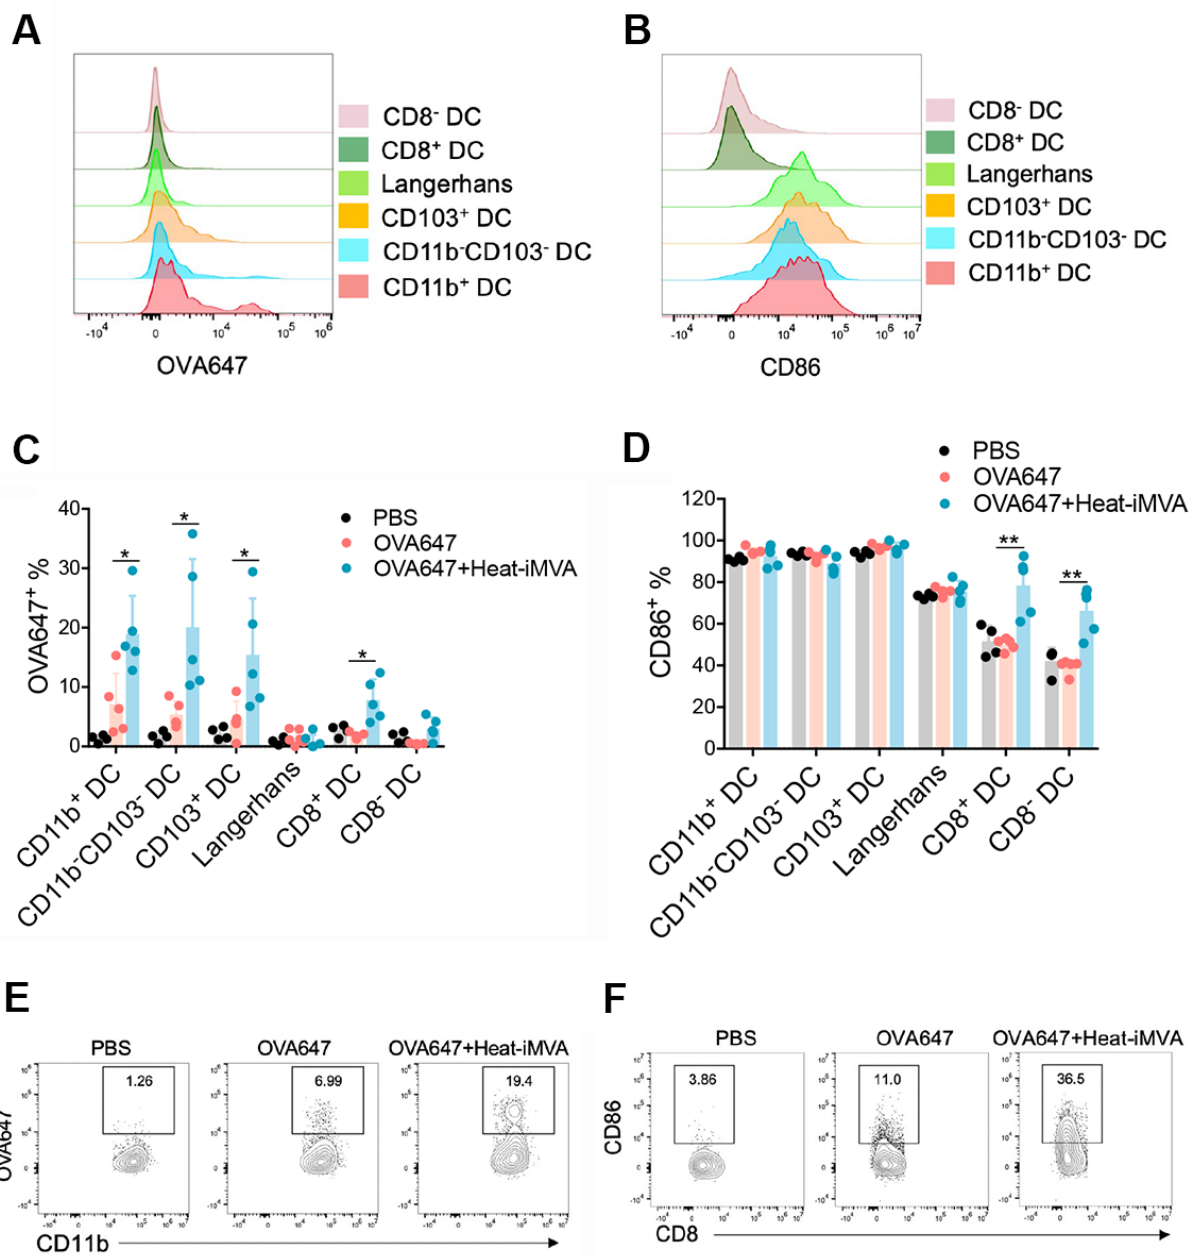

583 **Figure 6. Co-administration of heat-iMVA promotes trafficking of antigen-carrying**  
584 **migratory DC into skin draining LN and activation of resident dendritic cells.** C57/B6J  
585 mice were intradermally vaccinated with OVA647 (5  $\mu$ g) in the presence or absence of heat-  
586 iMVA ( $10^7$  pfu). (A-B) After 24 h, OVA647 intensities in different dendritic cells populations  
587 from dLNs were measured. (C) Cell numbers of different DC populations were calculated. (D-E)  
588 After 24 h, CD86 expressions in different dendritic cells populations from dLNs were measured.  
589 (E-F) Representative dot plots of CD86 expression in CD8<sup>-</sup> dendritic cells (E) and CD8<sup>+</sup>  
590 dendritic cells (F). Data are represented as mean  $\pm$  SEM ( $n = 3-5$ ; \* $P < 0.05$ , and \*\* $P < 0.01$ ;  
591 unpaired  $t$  test). Data are representative of three independent experiments.

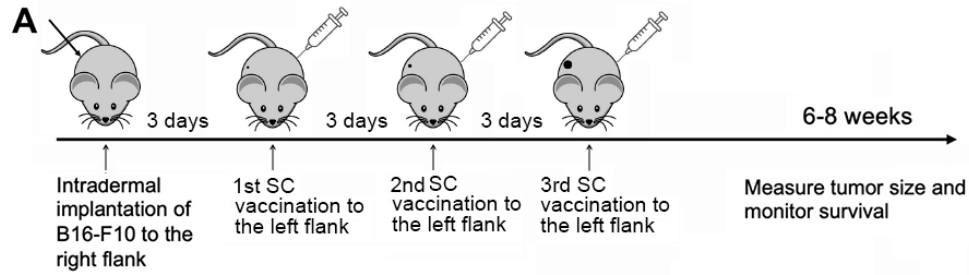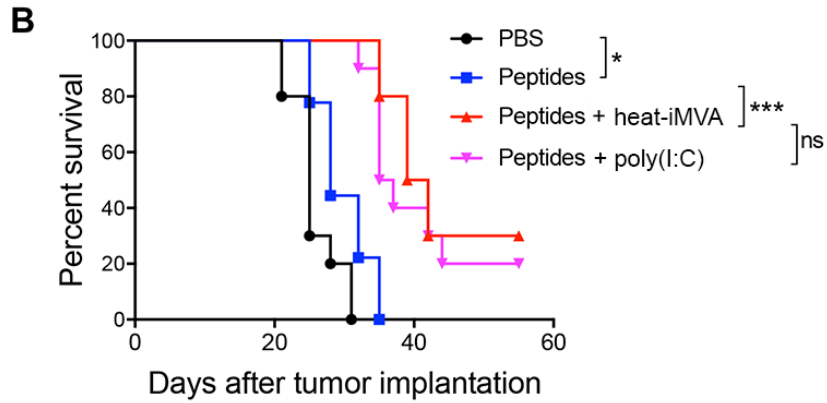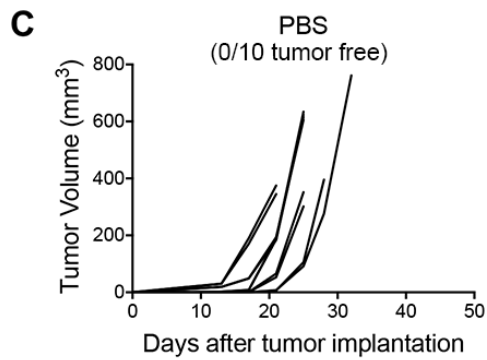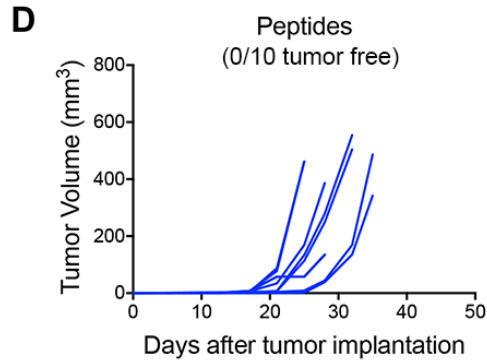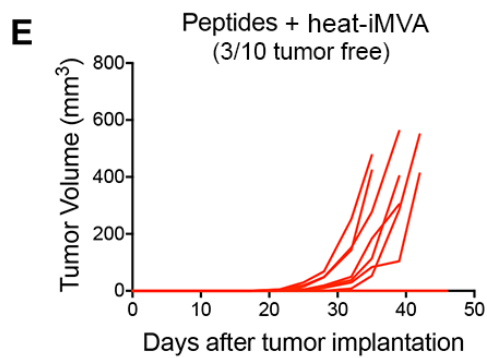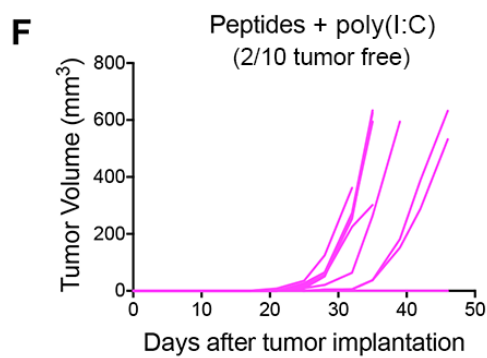

592 **Figure 7. Combination of B16-F10 neoantigen peptides with heat-iMVA vaccination**  
593 **significantly increases the overall response and cure rates in a unilateral B16-F10**  
594 **implantation model.** (A) Tumor implantation and neoantigen peptide vaccination scheme in a  
595 unilateral B16-F10 tumor implantation model.  $5 \times 10^4$  B16-F10 were intradermally implanted  
596 into the right flanks of C57BL/6J mice. On day 3, 6, and 9, mice were vaccinated subcutaneously  
597 on the left flanks with B16-F10 neoantigen peptide mix (M27, M30, and M48) with or without  
598 the indicated adjuvants. (B) Kaplan-Meier survival curve of tumor-bearing mice treated with  
599 PBS, peptides (M27, M30, and M48, 100  $\mu\text{g}$ /each), peptides plus heat-iMVA (an equivalent of  
600  $10^7$  pfu), or peptides plus poly(I:C) (50  $\mu\text{g}$ ) ( $n = 10$ ,  $*P < 0.05$  and  $***P < 0.001$ ; Mantel-Cox test).  
601 (C, D, E, F) Tumor volumes over days after implantation in mice vaccinated with PBS (C),  
602 peptides (D), peptides + heat-iMVA (E), peptides + poly(I:C) (F). Data are representative of two  
603 independent experiments.

604 **Acknowledgements**

605 We thank the Flow Cytometry Core Facility and Molecular Cytology Core Facility at the Sloan  
606 Kettering Institute. We also thank the Rockefeller University Genomics Resource Center. We  
607 thank Peihong Dai's technical support for BMDC RNA-seq experiments. We also thank  
608 Shuaitong Liu and Yi Wang's technical assistance on antigen cross-presentation assay.

609

610 **Funding**

611 This work was supported by NIH grants K-08 AI073736 (L.D.), R56AI095692 (L.D.),  
612 R03 AR068118 (L.D.), R01 CA56821 (J.D.W), Society of Memorial Sloan Kettering (MSK)  
613 research grant (L.D.), MSK Technology Development Fund (L.D.), Parker Institute for Cancer  
614 Immunotherapy Career Development Award (L.D.). This work was supported in part by the  
615 Swim across America (J.D.W., T.M.), Ludwig Institute for Cancer Research (J.D.W., T.M.).  
616 This research was also funded in part through the NIH/NCI Cancer Center Support Grant P30  
617 CA008748.

618

619 **Availability of data and materials**

620 All data published in this report are available on reasonable request.

621 RNA-sequencing data have been deposited at NCBI Short-Read Archive (SRA) and are publicly  
622 available as of the date of publication under the BioProject number PRJNA743347.

623 <https://dataview.ncbi.nlm.nih.gov/object/PRJNA743347?reviewer=23jdtbg40kcljcqf9b75ubqei6>

624

625 **Authors' contributions**

626 N.Y. and L.D. designed and performed the experiments, analyzed the data, and prepared the  
627 manuscript. A.G. and C.M. performed the library preparation for RNA-seq of virus-infected



628 BMDCs and analyzed the RNA-seq data. Memorial Sloan Kettering Cancer Center filed a patent  
629 application for the Heat-inactivated vaccinia virus as a vaccine immune adjuvant. J.D.W., T.M.,  
630 and T.T. assisted in experimental design and data interpretation. All authors are involved in  
631 manuscript preparation. L.D. provided overall supervision of the study.

632

### 633 **Competing Interests**

634 Memorial Sloan Kettering Cancer Center filed a patent application for the heat-inactivated  
635 vaccinia virus as a vaccine immune adjuvant. L.D., J.D.W., T.M., N.Y. are authors on the patent,  
636 which has been licensed to IMVAQ Therapeutics. L.D., J.D.W., T.M., N.Y. are co-founders of  
637 IMVAQ Therapeutics. L.D. is a consultant of Istari Oncology. T.M. is a consultant of Immunos  
638 Therapeutics and Pfizer. He has research support from Bristol Myers Squibb; Surface Oncology;  
639 Kyn Therapeutics; Infinity Pharmaceuticals, Inc.; Peregrine Pharmaceuticals, Inc.; Adaptive  
640 Biotechnologies; Leap Therapeutics, Inc.; and Aprea. He has patents on applications related to  
641 work on oncolytic viral therapy, alpha virus-based vaccine, neoantigen modeling, CD40, GITR,  
642 OX40, PD-1, and CTLA-4. J.D.W. is a consultant for Adaptive Biotech, Advaxis, Am-gen,  
643 Apricity, Array BioPharma, Ascentage Pharma, Astellas, Bayer, Beigene, Bristol Myers Squibb,  
644 Celgene, Chugai, Elucida, Eli Lilly, F Star, Genentech, Imvaq, Janssen, Kleo Pharma, Linnaeus,  
645 MedImmune, Merck, Neon Therapeutics, Ono, Polaris Pharma, Polynoma, Psioxus, Puretech,  
646 Recepta, Trieza, Sellas Life Sciences, Seramatrix, Surface Oncology, and Syndax. Research  
647 support: Bristol Myers Squibb, Medimmune, Merck Pharmaceuticals, and Genentech. Equity:  
648 Potenza Therapeutics, Tizona Pharmaceuticals, Adaptive Biotechnologies, Elucida, Imvaq,  
649 Beigene, Trieza, and Linnaeus. Honorarium: Esanex. Patents: xenogeneic DNA vaccines,  
650 alphavirus replicon particles ex-expressing TRP2, MDSC assay, Newcastle disease viruses for  
651 cancer therapy, genomic signature to identify responders to ipilimumab in melanoma, engineered

652 vaccinia viruses for cancer immunotherapy, anti-CD40 agonist mono-clonal antibody (mAb)  
653 fused to monophosphoryl lipid A (MPL) for cancer therapy, CAR T cells targeting  
654 differentiation antigens as means to treat cancer, anti-PD-1 antibody, anti-CTLA-4 antibodies,  
655 and anti-GITR antibodies and methods of use thereof.

656 **Patient consent for publication**

657 N/A

658

659 **Ethics approval and consent to participate**

660 N/A

## 661 References

- 662 1. Sahin U, Derhovanesian E, Miller M, et al. Personalized RNA mutanome vaccines mobilize  
663 poly-specific therapeutic immunity against cancer. *Nature* 2017;547(7662):222-26. doi:  
664 10.1038/nature23003 [published Online First: 2017/07/06]
- 665 2. Ott PA, Hu Z, Keskin DB, et al. An immunogenic personal neoantigen vaccine for patients  
666 with melanoma. *Nature* 2017;547(7662):217-21. doi: 10.1038/nature22991 [published  
667 Online First: 2017/07/06]
- 668 3. Schumacher TN, Schreiber RD. Neoantigens in cancer immunotherapy. *Science*  
669 2015;348(6230):69-74. doi: 10.1126/science.aaa4971 [published Online First:  
670 2015/04/04]
- 671 4. Castle JC, Kreiter S, Diekmann J, et al. Exploiting the mutanome for tumor vaccination.  
672 *Cancer Res* 2012;72(5):1081-91. doi: 10.1158/0008-5472.CAN-11-3722 [published  
673 Online First: 2012/01/13]
- 674 5. Matsushita H, Vesely MD, Koboldt DC, et al. Cancer exome analysis reveals a T-cell-  
675 dependent mechanism of cancer immunoediting. *Nature* 2012;482(7385):400-4. doi:  
676 10.1038/nature10755 [published Online First: 2012/02/10]
- 677 6. Keskin DB, Anandappa AJ, Sun J, et al. Neoantigen vaccine generates intratumoral T cell  
678 responses in phase Ib glioblastoma trial. *Nature* 2019;565(7738):234-39. doi:  
679 10.1038/s41586-018-0792-9 [published Online First: 2018/12/21]
- 680 7. Hu Z, Leet DE, Allesoe RL, et al. Personal neoantigen vaccines induce persistent memory T  
681 cell responses and epitope spreading in patients with melanoma. *Nat Med*  
682 2021;27(3):515-25. doi: 10.1038/s41591-020-01206-4 [published Online First:  
683 2021/01/23]
- 684 8. Pulendran B, P SA, O'Hagan DT. Emerging concepts in the science of vaccine adjuvants. *Nat*  
685 *Rev Drug Discov* 2021;20(6):454-75. doi: 10.1038/s41573-021-00163-y [published  
686 Online First: 2021/04/08]
- 687 9. Kinkead HL, Hopkins A, Lutz E, et al. Combining STING-based neoantigen-targeted vaccine  
688 with checkpoint modulators enhances antitumor immunity in murine pancreatic cancer.  
689 *JCI Insight* 2018;3(20) doi: 10.1172/jci.insight.122857 [published Online First:  
690 2018/10/20]
- 691 10. Wang J, Li P, Wu MX. Natural STING Agonist as an "Ideal" Adjuvant for Cutaneous  
692 Vaccination. *J Invest Dermatol* 2016;136(11):2183-91. doi: 10.1016/j.jid.2016.05.105  
693 [published Online First: 2016/10/25]
- 694 11. Kasturi SP, Skountzou I, Albrecht RA, et al. Programming the magnitude and persistence of  
695 antibody responses with innate immunity. *Nature* 2011;470(7335):543-7. doi:  
696 10.1038/nature09737 [published Online First: 2011/02/26]
- 697 12. Amara RR, Villinger F, Altman JD, et al. Control of a mucosal challenge and prevention of  
698 AIDS by a multiprotein DNA/MVA vaccine. *Science* 2001;292(5514):69-74. doi:  
699 10.1126/science.1058915 [published Online First: 2001/06/08]
- 700 13. Bisht H, Roberts A, Vogel L, et al. Severe acute respiratory syndrome coronavirus spike  
701 protein expressed by attenuated vaccinia virus protectively immunizes mice. *Proc Natl*  
702 *Acad Sci U S A* 2004;101(17):6641-6. doi: 10.1073/pnas.0401939101 [published Online  
703 First: 2004/04/21]
- 704 14. Sutter G, Wyatt LS, Foley PL, et al. A recombinant vector derived from the host range-  
705 restricted and highly attenuated MVA strain of vaccinia virus stimulates protective

- 706 immunity in mice to influenza virus. *Vaccine* 1994;12(11):1032-40. doi: 10.1016/0264-  
707 410x(94)90341-7 [published Online First: 1994/08/01]
- 708 15. Earl PL, Americo JL, Wyatt LS, et al. Immunogenicity of a highly attenuated MVA smallpox  
709 vaccine and protection against monkeypox. *Nature* 2004;428(6979):182-5. doi:  
710 10.1038/nature02331 [published Online First: 2004/03/12]
- 711 16. Horton H, Vogel TU, Carter DK, et al. Immunization of rhesus macaques with a DNA  
712 prime/modified vaccinia virus Ankara boost regimen induces broad simian  
713 immunodeficiency virus (SIV)-specific T-cell responses and reduces initial viral  
714 replication but does not prevent disease progression following challenge with pathogenic  
715 SIVmac239. *J Virol* 2002;76(14):7187-202. doi: 10.1128/jvi.76.14.7187-7202.2002  
716 [published Online First: 2002/06/20]
- 717 17. Pittman PR, Hahn M, Lee HS, et al. Phase 3 Efficacy Trial of Modified Vaccinia Ankara as a  
718 Vaccine against Smallpox. *N Engl J Med* 2019;381(20):1897-908. doi:  
719 10.1056/NEJMoa1817307 [published Online First: 2019/11/14]
- 720 18. Gilbert SC. Clinical development of Modified Vaccinia virus Ankara vaccines. *Vaccine*  
721 2013;31(39):4241-6. doi: 10.1016/j.vaccine.2013.03.020 [published Online First:  
722 2013/03/26]
- 723 19. Volz A, Sutter G. Modified Vaccinia Virus Ankara: History, Value in Basic Research, and  
724 Current Perspectives for Vaccine Development. *Adv Virus Res* 2017;97:187-243. doi:  
725 10.1016/bs.aivir.2016.07.001 [published Online First: 2017/01/07]
- 726 20. Dai P, Wang W, Cao H, et al. Modified vaccinia virus Ankara triggers type I IFN production  
727 in murine conventional dendritic cells via a cGAS/STING-mediated cytosolic DNA-  
728 sensing pathway. *PLoS Pathog* 2014;10(4):e1003989. doi: 10.1371/journal.ppat.1003989  
729 [published Online First: 2014/04/20]
- 730 21. Seet BT, Johnston JB, Brunetti CR, et al. Poxviruses and immune evasion. *Annu Rev*  
731 *Immunol* 2003;21:377-423. doi: 10.1146/annurev.immunol.21.120601.141049  
732 120601.141049 [pii] [published Online First: 2003/01/25]
- 733 22. Brady G, Bowie AG. Innate immune activation of NFkappaB and its antagonism by  
734 poxviruses. *Cytokine & growth factor reviews* 2014;25(5):611-20. doi:  
735 10.1016/j.cytogfr.2014.07.004 [published Online First: 2014/08/02]
- 736 23. Ning Yang JML, Peihong Dai, Yi Wang, Charles M. Rice, Liang Deng. Lung type II alveolar  
737 epithelial cells collaborate with CCR2+ inflammatory monocytes in host defense against  
738 an acute vaccinia infection in the lungs. *BioRxiv* 2020;10.1101/2020.01.20.910927
- 739 24. Cao H, Dai P, Wang W, et al. Innate immune response of human plasmacytoid dendritic cells  
740 to poxvirus infection is subverted by vaccinia E3 via its Z-DNA/RNA binding domain.  
741 *PLoS One* 2012;7(5):e36823. doi: 10.1371/journal.pone.0036823 [published Online First:  
742 2012/05/19]
- 743 25. Dai P, Wang W, Yang N, et al. Intratumoral delivery of inactivated modified vaccinia virus  
744 Ankara (iMVA) induces systemic antitumor immunity via STING and Batf3-dependent  
745 dendritic cells. *Sci Immunol* 2017;2(11) doi: 10.1126/sciimmunol.aal1713 [published  
746 Online First: 2017/08/02]
- 747 26. Dai P, Cao H, Merghoub T, et al. Myxoma virus induces type I interferon production in  
748 murine plasmacytoid dendritic cells via a TLR9/MyD88-, IRF5/IRF7-, and IFNAR-  
749 dependent pathway. *J Virol* 2011;85(20):10814-25. doi: 10.1128/JVI.00104-11  
750 [published Online First: 2011/08/13]

- 751 27. Percie du Sert N, Hurst V, Ahluwalia A, et al. The ARRIVE guidelines 2.0: updated  
752 guidelines for reporting animal research. *BMJ Open Sci* 2020;4(1):e100115. doi:  
753 10.1136/bmjos-2020-100115 [published Online First: 2021/06/08]
- 754 28. Moore MJ, Dorfman T, Li W, et al. Retroviruses pseudotyped with the severe acute  
755 respiratory syndrome coronavirus spike protein efficiently infect cells expressing  
756 angiotensin-converting enzyme 2. *J Virol* 2004;78(19):10628-35. doi:  
757 10.1128/JVI.78.19.10628-10635.2004 [published Online First: 2004/09/16]
- 758 29. Dranoff G, Jaffee E, Lazenby A, et al. Vaccination with irradiated tumor cells engineered to  
759 secrete murine granulocyte-macrophage colony-stimulating factor stimulates potent,  
760 specific, and long-lasting anti-tumor immunity. *Proc Natl Acad Sci U S A*  
761 1993;90(8):3539-43. doi: 10.1073/pnas.90.8.3539 [published Online First: 1993/04/15]
- 762 30. Yang N, Ma P, Lang J, et al. Phosphatidylinositol 4-kinase IIIbeta is required for severe  
763 acute respiratory syndrome coronavirus spike-mediated cell entry. *J Biol Chem*  
764 2012;287(11):8457-67. doi: 10.1074/jbc.M111.312561 [published Online First:  
765 2012/01/19]
- 766 31. Trapnell C, Roberts A, Goff L, et al. Differential gene and transcript expression analysis of  
767 RNA-seq experiments with TopHat and Cufflinks. *Nat Protoc* 2012;7(3):562-78. doi:  
768 10.1038/nprot.2012.016 [published Online First: 2012/03/03]
- 769 32. Petrovsky N, Aguilar JC. Vaccine adjuvants: current state and future trends. *Immunology and*  
770 *cell biology* 2004;82(5):488-96. doi: 10.1111/j.0818-9641.2004.01272.x [published  
771 Online First: 2004/10/14]
- 772 33. Chappell KJ, Mordant FL, Li Z, et al. Safety and immunogenicity of an MF59-adjuvanted  
773 spike glycoprotein-clamp vaccine for SARS-CoV-2: a randomised, double-blind,  
774 placebo-controlled, phase 1 trial. *Lancet Infect Dis* 2021 doi: 10.1016/S1473-  
775 3099(21)00200-0 [published Online First: 2021/04/23]
- 776 34. Vono M, Taccone M, Caccin P, et al. The adjuvant MF59 induces ATP release from muscle  
777 that potentiates response to vaccination. *Proc Natl Acad Sci U S A* 2013;110(52):21095-  
778 100. doi: 10.1073/pnas.1319784110 [published Online First: 2013/12/11]
- 779 35. Hildner K, Edelson BT, Purtha WE, et al. Batf3 deficiency reveals a critical role for  
780 CD8alpha+ dendritic cells in cytotoxic T cell immunity. *Science* 2008;322(5904):1097-  
781 100. doi: 10.1126/science.1164206 [published Online First: 2008/11/15]
- 782 36. Li XD, Wu J, Gao D, et al. Pivotal roles of cGAS-cGAMP signaling in antiviral defense and  
783 immune adjuvant effects. *Science* 2013;341(6152):1390-4. doi: 10.1126/science.1244040  
784 [published Online First: 2013/08/31]
- 785 37. Yang Z, Bruno DP, Martens CA, et al. Simultaneous high-resolution analysis of vaccinia  
786 virus and host cell transcriptomes by deep RNA sequencing. *Proc Natl Acad Sci U S A*  
787 2010;107(25):11513-8. doi: 10.1073/pnas.1006594107 [published Online First:  
788 2010/06/11]
- 789 38. Merad M, Sathe P, Helft J, et al. The dendritic cell lineage: ontogeny and function of  
790 dendritic cells and their subsets in the steady state and the inflamed setting. *Annu Rev*  
791 *Immunol* 2013;31:563-604. doi: 10.1146/annurev-immunol-020711-074950 [published  
792 Online First: 2013/03/23]
- 793 39. Allan RS, Waithman J, Bedoui S, et al. Migratory dendritic cells transfer antigen to a lymph  
794 node-resident dendritic cell population for efficient CTL priming. *Immunity*  
795 2006;25(1):153-62. doi: 10.1016/j.immuni.2006.04.017 [published Online First:  
796 2006/07/25]

- 797 40. Gurevich I, Feferman T, Milo I, et al. Active dissemination of cellular antigens by DCs  
798 facilitates CD8(+) T-cell priming in lymph nodes. *Eur J Immunol* 2017;47(10):1802-18.  
799 doi: 10.1002/eji.201747042 [published Online First: 2017/09/06]
- 800 41. Idoyaga J, Fiorese C, Zbytnuik L, et al. Specialized role of migratory dendritic cells in  
801 peripheral tolerance induction. *J Clin Invest* 2013;123(2):844-54. doi: 10.1172/JCI65260  
802 [published Online First: 2013/01/10]
- 803 42. Carbone FR, Belz GT, Heath WR. Transfer of antigen between migrating and lymph node-  
804 resident DCs in peripheral T-cell tolerance and immunity. *Trends Immunol*  
805 2004;25(12):655-8. doi: 10.1016/j.it.2004.09.013 [published Online First: 2004/11/09]
- 806 43. Steinman RM, Banchereau J. Taking dendritic cells into medicine. *Nature*  
807 2007;449(7161):419-26. doi: 10.1038/nature06175 [published Online First: 2007/09/28]
- 808 44. Kool M, Soullie T, van Nimwegen M, et al. Alum adjuvant boosts adaptive immunity by  
809 inducing uric acid and activating inflammatory dendritic cells. *J Exp Med*  
810 2008;205(4):869-82. doi: 10.1084/jem.20071087 [published Online First: 2008/03/26]
- 811 45. Kim EH, Woodruff MC, Grigoryan L, et al. Squalene emulsion-based vaccine adjuvants  
812 stimulate CD8 T cell, but not antibody responses, through a RIPK3-dependent pathway.  
813 *Elife* 2020;9 doi: 10.7554/eLife.52687 [published Online First: 2020/06/10]
- 814 46. Baharom F, Ramirez-Valdez RA, Tobin KKS, et al. Intravenous nanoparticle vaccination  
815 generates stem-like TCF1(+) neoantigen-specific CD8(+) T cells. *Nat Immunol*  
816 2021;22(1):41-52. doi: 10.1038/s41590-020-00810-3 [published Online First:  
817 2020/11/04]
- 818 47. Barnowski C, Ciupka G, Tao R, et al. Efficient Induction of Cytotoxic T Cells by Viral  
819 Vector Vaccination Requires STING-Dependent DC Functions. *Front Immunol*  
820 2020;11:1458. doi: 10.3389/fimmu.2020.01458 [published Online First: 2020/08/09]
- 821 48. Kastenmuller K, Wille-Reece U, Lindsay RW, et al. Protective T cell immunity in mice  
822 following protein-TLR7/8 agonist-conjugate immunization requires aggregation, type I  
823 IFN, and multiple DC subsets. *J Clin Invest* 2011;121(5):1782-96. doi: 10.1172/JCI45416  
824 [published Online First: 2011/05/05]
- 825 49. Krishnaswamy JK, Gowthaman U, Zhang B, et al. Migratory CD11b(+) conventional  
826 dendritic cells induce T follicular helper cell-dependent antibody responses. *Sci Immunol*  
827 2017;2(18) doi: 10.1126/sciimmunol.aam9169 [published Online First: 2017/12/03]
- 828 50. Wang J, Li P, Yu Y, et al. Pulmonary surfactant-biomimetic nanoparticles potentiate  
829 heterosubtypic influenza immunity. *Science* 2020;367(6480) doi:  
830 10.1126/science.aau0810 [published Online First: 2020/02/23]
- 831 51. Wang Z, Celis E. STING activator c-di-GMP enhances the anti-tumor effects of peptide  
832 vaccines in melanoma-bearing mice. *Cancer Immunol Immunother* 2015;64(8):1057-66.  
833 doi: 10.1007/s00262-015-1713-5 [published Online First: 2015/05/20]
- 834 52. Volckmar J, Knop L, Stegemann-Koniszewski S, et al. The STING activator c-di-AMP  
835 exerts superior adjuvant properties than the formulation poly(I:C)/CpG after  
836 subcutaneous vaccination with soluble protein antigen or DEC-205-mediated antigen  
837 targeting to dendritic cells. *Vaccine* 2019;37(35):4963-74. doi:  
838 10.1016/j.vaccine.2019.07.019 [published Online First: 2019/07/20]
- 839 53. Sauer JD, Sotelo-Troha K, von Moltke J, et al. The N-ethyl-N-nitrosourea-induced  
840 Goldenticket mouse mutant reveals an essential function of Sting in the in vivo interferon  
841 response to *Listeria monocytogenes* and cyclic dinucleotides. *Infect Immun*  
842 2011;79(2):688-94. doi: 10.1128/IAI.00999-10 [published Online First: 2010/11/26]

- 843 54. Hornung V, Ablasser A, Charrel-Dennis M, et al. AIM2 recognizes cytosolic dsDNA and  
844 forms a caspase-1-activating inflammasome with ASC. *Nature* 2009;458(7237):514-8.  
845 doi: 10.1038/nature07725 [published Online First: 2009/01/23]
- 846 55. Reynoso GV, Weisberg AS, Shannon JP, et al. Lymph node conduits transport virions for  
847 rapid T cell activation. *Nat Immunol* 2019;20(5):602-12. doi: 10.1038/s41590-019-0342-  
848 0 [published Online First: 2019/03/20]
- 849 56. Norder M, Becker PD, Drexler I, et al. Modified vaccinia virus Ankara exerts potent immune  
850 modulatory activities in a murine model. *PLoS One* 2010;5(6):e11400. doi:  
851 10.1371/journal.pone.0011400 [published Online First: 2010/07/16]
